# Supplementary material for: The mechanism of Renshen-Fuzi herb pair for treating heart failure—Integrating a cardiovascular pharmacological assessment with serum metabolomics
Source: Front Pharmacol. 2022 Dec 5;13:995796. doi: 10.3389/fphar.2022.995796 (PMC9760753; doi:10.3389/fphar.2022.995796)
Supplement: Supplementary file 1 [file Table2.XLSX]

## Sheet: Table S2
Table S2 Herbal compounds in RS-FZ
Label	Chemical name	CAS number
FZ001	mesaconitine	2752-64-9
FZ004	salsolinol	27740-96-1
FZ005	beiwutine	76918-93-9
FZ006	karacoline	39089-30-0
FZ010	benzoylmesaconine	63238-67-5
FZ013	mesaconine	6792-09-2
FZ014	methyl dopa	555-30-6
FZ015	coryneine	7224-66-0
RS001	3-acetylpanaxydol	121820-32-4
RS002	butylated hydroxytoluene	128-37-0
RS003	2,6-Di-tert-butylhydroquinone	2444-28-2
RS004	succinic acid	110-15-6
RS005	β-caryophyllene	87-44-5
RS006	caryophyllenol	472-97-9
RS008	20(R)-Ginsenoside Rh2	112246-15-8
RS009	panose	33401-87-5
RS010	Ginsenoside Ra1	83459-41-0
RS011	Ginsenoside Rb1	41753-43-9
RS012	Ginsenoside Rb2	11021-13-9
RS013	Ginsenoside Rb3	68406-26-8
RS014	Ginsenoside Rc	11021-14-0
RS015	Ginsenoside Rd	52705-93-8
RS016	Ginsenoside Re	52286-59-6
RS017	Ginsenoside Rf	52286-58-5
RS018	Ginsenoside Rg1	22427-39-0
RS019	Ginsenoside Rg2	52286-74-5
RS020	Ginsenoside Rg3	14197-60-5
RS022	Ginsenoside Ro	34367-04-9
RS023	Ginsenoside Rs2	87733-66-2
RS024	panaxydol	72800-72-7
RS025	Ginsenoyne A	139163-34-1
RS028	panaxynol	81203-57-8
RS029	panasinsanol A	80374-27-2
RS030	ginsenol	117591-80-7
RS031	notoginsenoside R1	80418-24-2
RS032	notoginsenoside R4	87741-77-3
RS033	trilinolein	537-40-6
RS034	tripalmitin	555-44-2
RS036	γ-patchoulene	508-55-4
RS039	widdrol	6892-80-4
RS040	xylose	41247-05-6
RS042	salicylic acid	69-72-7
RS043	bicyclogermacrene	24703-35-3
RS044	D-mannose	3458-28-4
RS045	α-Gurjunene	489-40-7
RS046	β-Gurjunene	73464-47-8
RS047	γ-Gurjunene	22567-17-5
RS048	malonyl ginsenoside Rb1	88140-34-5
RS049	5-methoxybenzofuran	13391-28-1
RS050	galactose	10257-28-0
RS051	galacturonic acid	14982-50-4
RS052	4-Tert-Butylanisole	5396-38-3
RS053	linoleic acid	60-33-3
RS055	piperonal	120-57-0
RS056	α-muurolene	69671-15-4
RS057	mayurone	4677-90-1
RS058	maltol	118-71-8
RS059	maltose	69-79-4
RS060	α-selinene	473-13-2
RS061	β-selinene	17066-67-0
RS062	stigmasterol	83-48-7
RS063	alloaromadendrene	25246-27-9
RS064	eremophilene	10219-75-7
RS065	β-sitosterol	83-46-5
RS066	alexandrin	474-58-8
RS067	soybean phospholipid	8002-43-5
RS068	malic acid	6915-15-7
RS070	α-cubebene	17699-14-8
RS071	citric acid	77-92-9
RS072	choline	62-49-7
RS074	sphingomyelin	85187-10-6
RS075	20(R)-protopanaxatriol	1453-93-6
RS076	nicotinic acid	59-67-6
RS077	tartaric acid	147-71-7
RS078	campesterol	474-62-4
RS079	spathulenol	6750-60-3
RS080	β-bisabolene	495-61-4
RS081	proline	344-25-2
RS082	α-humulene	6753-98-6
RS083	β-humulene	116-04-1
RS084	20-Glucoginsenoside Rf	68406-27-9
RS085	raffinose	512-69-6
RS086	palmitoleic acid	373-49-9
RS087	globulol	19078-39-8
RS088	lysine	56-87-1
RS089	α-guaiene	3691-12-1
RS090	β-guaiene	87745-31-1
RS091	adenosine	58-61-7
RS092	α-neoclovene	4545-68-0
RS093	neointermedeol	5945-72-2
RS094	arginine	7004-12-8
RS097	Ginsenoside Ra2	83459-42-1
RS098	Ginsenoside Ra3	90985-77-6
RS099	Ginsenoyne B	139035-29-3
RS101	Ginsenoyne D	138828-83-8
RS102	Ginsenoyne E	126146-63-2
RS105	Ginsenoyne H	142465-54-1
RS106	Ginsenoyne I	141947-40-2
RS107	Ginsenoyne J	141947-41-3
RS109	panasinsanol B	109785-99-1
RS111	gomisin E	72960-21-5
RS114	gomisin N	69176-52-9
RS115	malonyl ginsenoside Rb2	——
RS116	malonyl ginsenoside Rd	——
RS117	α-panasinsene	56633-28-4
RS118	β-panasinsene	56684-97-0
RS119	20(R)-Ginsenoside Rg2	80952-72-3
RS120	Ginsenoside Rs1	87733-67-3
