# Supplementary material for: The mechanism of Renshen-Fuzi herb pair for treating heart failure—Integrating a cardiovascular pharmacological assessment with serum metabolomics
Source: Front Pharmacol. 2022 Dec 5;13:995796. doi: 10.3389/fphar.2022.995796 (PMC9760753; doi:10.3389/fphar.2022.995796)
Supplement: Supplementary file 3 [file Table1.XLSX]

## Sheet: Table S1
Table S1 Target proteins of RS-FZ
Label	Target name	Gene name	Uniprot ID
RS001	Smoothened homolog	SMO	Q99835
RS001	Type-1 angiotensin II receptor	AGTR1	P30556
RS001	Cholesteryl ester transfer protein	CETP	P11597
RS001	Phosphodiesterase 10A	PDE10A	Q9Y233
RS001	Platelet activating factor receptor	PTAFR	P25105
RS001	Liver glycogen phosphorylase	PYGL	P06737
RS001	Cholecystokinin B receptor	CCKBR	P32239
RS001	Glucose-dependent insulinotropic receptor	GPR119	Q8TDV5
RS001	Fatty acid synthase	FASN	P49327
RS001	Melatonin receptor 1A	MTNR1A	P48039
RS001	Melatonin receptor 1B	MTNR1B	P49286
RS001	Neurokinin 1 receptor	TACR1	P25103
RS001	Bile acid receptor FXR	NR1H4	Q96RI1
RS001	Tyrosine-protein kinase SYK	SYK	P43405
RS001	Vasopressin V2 receptor (by homology)	AVPR2	P30518
RS001	Oxytocin receptor (by homology)	OXTR	P30559
RS001	Sphingosine 1-phosphate receptor Edg-3	S1PR3	Q99500
RS001	Cytochrome P450 19A1	CYP19A1	P11511
RS001	Epidermal growth factor receptor erbB1	EGFR	P00533
RS001	Serine/threonine-protein kinase mTOR	MTOR	P42345
RS001	Calcitonin gene-related peptide type 1 receptor	CALCRL	Q16602
RS001	Induced myeloid leukemia cell differentiation protein Mcl-1	MCL1	Q07820
RS001	Corticotropin releasing factor receptor 1	CRHR1	P34998
RS001	Prostanoid EP4 receptor	PTGER4	P35408
RS001	Corticotropin releasing factor receptor 2	CRHR2	Q13324
RS001	Insulin-like growth factor I receptor	IGF1R	P08069
RS001	Gamma-secretase	PSEN2	P49810
RS001	Cathepsin K	CTSK	P43235
RS001	Cathepsin S	CTSS	P25774
RS001	Cathepsin L	CTSL	P07711
RS001	Beta amyloid A4 protein	APP	P05067
RS001	Beta-secretase 1	BACE1	P56817
RS001	Adenosine A1 receptor	ADORA1	P30542
RS001	Neurokinin 2 receptor	TACR2	P21452
RS001	Adenosine A2b receptor	ADORA2B	P29275
RS001	Sodium/calcium exchanger 1	SLC8A1	P32418
RS001	Neuropeptide Y receptor type 5 (by homology)	NPY5R	Q15761
RS001	Prostanoid EP1 receptor	PTGER1	P34995
RS001	PI3-kinase p110-delta subunit	PIK3CD	O00329
RS001	Prostanoid EP3 receptor	PTGER3	P43115
RS001	PI3-kinase p110-alpha subunit	PIK3CA	P42336
RS001	MAP kinase p38 alpha	MAPK14	Q16539
RS001	Casein kinase I delta	CSNK1D	P48730
RS001	Kappa Opioid receptor	OPRK1	P41145
RS001	TAK1/TAB1	TAB1	Q15750
RS001	Mitogen-activated protein kinase kinase kinase 7	MAP3K7	O43318
RS001	Protein farnesyltransferase	FNTA	P49354
RS001	Muscarinic acetylcholine receptor M2	CHRM2	P08172
RS001	Muscarinic acetylcholine receptor M1	CHRM1	P11229
RS001	Muscarinic acetylcholine receptor M3	CHRM3	P20309
RS001	Serotonin 6 (5-HT6) receptor	HTR6	P50406
RS001	Nicotinamide phosphoribosyltransferase	NAMPT	P43490
RS001	Voltage-gated T-type calcium channel alpha-1H subunit	CACNA1H	O95180
RS001	Glucocorticoid receptor	NR3C1	P04150
RS001	Thrombin	F2	P00734
RS001	Thrombin and coagulation factor X	F10	P00742
RS001	Vascular endothelial growth factor receptor 2	KDR	P35968
RS001	Matrix metalloproteinase 13	MMP13	P45452
RS001	Tyrosine-protein kinase TIE-2	TEK	Q02763
RS001	Voltage-gated potassium channel subunit Kv1.5	KCNA5	P22460
RS001	Sodium/glucose cotransporter 1	SLC5A1	P13866
RS001	Vascular endothelial growth factor receptor 1	FLT1	P17948
RS001	Vascular endothelial growth factor receptor 3	FLT4	P35916
RS001	Cyclooxygenase-2 (by homology)	PTGS2	P35354
RS001	Calpain 2	CAPN2	P17655
RS001	Calpain 1	CAPN1	P07384
RS001	Cathepsin (B and K)	CTSB	P07858
RS001	Vanilloid receptor	TRPV1	Q8NER1
RS001	p53-binding protein Mdm-2	MDM2	Q00987
RS001	Serine/threonine-protein kinase TAO1	TAOK1	Q7L7X3
RS001	Serine/threonine-protein kinase TAO3	TAOK3	Q9H2K8
RS001	Prostanoid EP2 receptor	PTGER2	P43116
RS001	Vasopressin V1a receptor	AVPR1A	P37288
RS001	Insulin receptor	INSR	P06213
RS001	Thromboxane A2 receptor	TBXA2R	P21731
RS001	Tyrosine-protein kinase LCK	LCK	P06239
RS001	Phosphodiesterase 1A	PDE1A	P54750
RS001	Acetyl-CoA carboxylase 2	ACACB	O00763
RS001	C-C chemokine receptor type 1	CCR1	P32246
RS001	Acyl coenzyme A:cholesterol acyltransferase 1 (by homology)	SOAT1	P35610
RS001	Inhibitor of nuclear factor kappa B kinase beta subunit	IKBKB	O14920
RS001	Tyrosine-protein kinase JAK3	JAK3	P52333
RS001	Anandamide amidohydrolase (by homology)	FAAH	O00519
RS001	Melanocortin receptor 4	MC4R	P32245
RS001	c-Jun N-terminal kinase 3	MAPK10	P53779
RS001	Tyrosine-protein kinase JAK2	JAK2	O60674
RS001	Inhibitor of NF-kappa-B kinase (IKK)	CHUK	O15111
RS001	Protein-tyrosine phosphatase 2C	PTPN11	Q06124
RS001	C-C chemokine receptor type 8	CCR8	P51685
RS001	Tyrosine kinase non-receptor protein 2	TNK2	Q07912
RS001	Tyrosine-protein kinase BTK	BTK	Q06187
RS001	Cannabinoid receptor 1	CNR1	P21554
RS001	Cannabinoid receptor 2	CNR2	P34972
RS001	Endothelin receptor ET-B	EDNRB	P24530
RS001	Macrophage colony stimulating factor receptor	CSF1R	P07333
RS001	Glucagon receptor	GCGR	P47871
RS001	Endothelin receptor ET-A	EDNRA	P25101
RS001	Matrix metalloproteinase 1	MMP1	P03956
RS001	Prostaglandin E synthase	PTGES	O14684
RS001	Stem cell growth factor receptor	KIT	P10721
RS002	Carbonic anhydrase II	CA2	P00918
RS002	GABA-A receptor; alpha-1/beta-2/gamma-2	GABRA1	P14867
RS002	Serotonin 2b (5-HT2b) receptor	HTR2B	P41595
RS002	GABA-A receptor; alpha-1/beta-3/gamma-2	GABRB3	P28472
RS002	Cyclooxygenase-1	PTGS1	P23219
RS002	Norepinephrine transporter	SLC6A2	P23975
RS002	Serotonin 2c (5-HT2c) receptor	HTR2C	P28335
RS002	GABA-B receptor	GABBR2	O75899
RS002	Nuclear receptor ROR-gamma	RORC	P51449
RS002	Estrogen-related receptor gamma	ESRRG	P62508
RS002	Transient receptor potential cation channel subfamily A member 1	TRPA1	O75762
RS002	Estrogen receptor beta	ESR2	Q92731
RS002	Estrogen receptor alpha	ESR1	P03372
RS002	Serotonin 6 (5-HT6) receptor	HTR6	P50406
RS002	Tyrosinase	TYR	P14679
RS002	Nitric-oxide synthase, brain	NOS1	P29475
RS002	Nitric-oxide synthase, endothelial	NOS3	P29474
RS002	Testis-specific androgen-binding protein	SHBG	P04278
RS002	Hormone sensitive lipase	LIPE	Q05469
RS002	GABA-A receptor; alpha-3/beta-3/gamma-2	GABRB3	P28472
RS002	GABA-A receptor; alpha-2/beta-3/gamma-2	GABRA2	P47869
RS002	11-beta-hydroxysteroid dehydrogenase 1	HSD11B1	P28845
RS002	Translocator protein (by homology)	TSPO	P30536
RS002	Androgen Receptor	AR	P10275
RS002	Metabotropic glutamate receptor 5 (by homology)	GRM5	P41594
RS002	Puromycin-sensitive aminopeptidase	NPEPPS	P55786
RS002	Arachidonate 5-lipoxygenase	ALOX5	P09917
RS002	Cathepsin D	CTSD	P07339
RS002	Beta-secretase 1	BACE1	P56817
RS002	Aldose reductase	AKR1B1	P15121
RS002	Cathepsin (H and K)	CTSH	P09668
RS002	Cathepsin K	CTSK	P43235
RS002	Cathepsin L	CTSL	P07711
RS002	Cathepsin (B and K)	CTSB	P07858
RS002	Epoxide hydratase	EPHX2	P34913
RS002	Phosphodiesterase 7A	PDE7A	Q13946
RS002	Carbonic anhydrase IV	CA4	P22748
RS002	Acetylcholine receptor; alpha1/beta1/delta/gamma	CHRNB1	P11230
RS002	Neuronal acetylcholine receptor; alpha4/beta2	CHRNA4	P43681
RS002	Neuronal acetylcholine receptor subunit alpha-3	CHRNA3	P32297
RS002	Neuronal acetylcholine receptor protein alpha-7 subunit (by homology)	CHRNA7	P36544
RS002	Voltage-gated potassium channel subunit Kv1.3	KCNA3	P22001
RS002	Serine/threonine-protein kinase PIM1	PIM1	P11309
RS002	Serine/threonine-protein kinase PIM2	PIM2	Q9P1W9
RS002	Transient receptor potential cation channel subfamily M member 8 (by homology)	TRPM8	Q7Z2W7
RS002	Beta secretase 2	BACE2	Q9Y5Z0
RS002	Glycine receptor subunit alpha-1	GLRA1	P23415
RS002	Butyrylcholinesterase	BCHE	P06276
RS002	Glucagon receptor	GCGR	P47871
RS002	Epoxide hydrolase 1	EPHX1	P07099
RS002	Intercellular adhesion molecule (ICAM-1), Integrin alpha-L/beta-2	ITGAL	P20701
RS002	Anandamide amidohydrolase	FAAH	O00519
RS002	Melanocortin receptor 4	MC4R	P32245
RS002	Mannose-6-phosphate isomerase	MPI	P34949
RS002	Phosphoethanolamine/phosphocholine phosphatase	PHOSPHO1	Q8TCT1
RS002	Microtubule-associated protein tau	MAPT	P10636
RS002	Isocitrate dehydrogenase [NADP] cytoplasmic	IDH1	O75874
RS002	Cholecystokinin B receptor (by homology)	CCKBR	P32239
RS002	Serotonin 2a (5-HT2a) receptor (by homology)	HTR2A	P28223
RS002	Acetylcholinesterase	ACHE	P22303
RS002	Gamma-secretase	PSEN2	P49810
RS002	Neurokinin 2 receptor	TACR2	P21452
RS002	Sulfonylurea receptor 2, Kir6.2	KCNJ11	Q14654
RS002	Monoglyceride lipase	MGLL	Q99685
RS002	Prostanoid EP1 receptor	PTGER1	P34995
RS002	Cytochrome P450 11B1	CYP11B1	P15538
RS002	Acyl coenzyme A:cholesterol acyltransferase	CES1	P23141
RS002	Cytochrome P450 11B2	CYP11B2	P19099
RS002	Histamine H4 receptor	HRH4	Q9H3N8
RS002	Serotonin 1a (5-HT1a) receptor	HTR1A	P08908
RS002	Proteinase-activated receptor 1	F2R	P25116
RS002	Beta-chymotrypsin	CTRB1	P17538
RS002	Vasopressin V2 receptor	AVPR2	P30518
RS002	FK506-binding protein 1A	FKBP1A	P62942
RS002	GABA receptor alpha-1 subunit (by homology)	GABRA1	P14867
RS002	GABA receptor alpha-5 subunit (by homology)	GABRA5	P31644
RS002	Kir3.1/Kir3.4	KCNJ5	P48544
RS002	Kir3.1/Kir3.2	KCNJ6	P48051
RS002	G protein-coupled receptor 44	PTGDR2	Q9Y5Y4
RS002	Phosphomannomutase 2	PMM2	O15305
RS002	Beta amyloid A4 protein	APP	P05067
RS002	Sphingosine 1-phosphate receptor Edg-1	S1PR1	P21453
RS002	C-C chemokine receptor type 5	CCR5	P51681
RS002	Cyclin-dependent kinase 2	CDK2	P24941
RS002	Cyclin-dependent kinase 4	CDK4	P11802
RS002	Neuropeptide Y receptor type 5	NPY5R	Q15761
RS002	p53-binding protein Mdm-2	MDM2	Q00987
RS002	Lysine-specific demethylase 4D-like	KDM4E	B2RXH2
RS002	Dopamine D5 receptor	DRD5	P21918
RS002	Dopamine D1 receptor	DRD1	P21728
RS002	P-glycoprotein 1	ABCB1	P08183
RS002	P2X purinoceptor 7	P2RX7	Q99572
RS002	Interferon-induced, double-stranded RNA-activated protein kinase	EIF2AK2	P19525
RS002	Protein farnesyltransferase	FNTA	P49354
RS002	Neurokinin 1 receptor	TACR1	P25103
RS002	Adenosine A2b receptor	ADORA2B	P29275
RS002	Neurokinin 3 receptor	TACR3	P29371
RS002	Phosphodiesterase 10A	PDE10A	Q9Y233
RS002	Malate dehydrogenase, mitochondrial	MDH2	P40926
RS002	Pyruvate kinase isozymes M1/M2	PKM	P14618
RS003	Carbonic anhydrase II	CA2	P00918
RS003	Serotonin 2b (5-HT2b) receptor	HTR2B	P41595
RS003	Serotonin 2c (5-HT2c) receptor	HTR2C	P28335
RS003	Cyclooxygenase-1	PTGS1	P23219
RS003	Norepinephrine transporter	SLC6A2	P23975
RS003	GABA-A receptor; alpha-1/beta-2/gamma-2	GABRA1	P14867
RS003	GABA-A receptor; alpha-1/beta-3/gamma-2	GABRB3	P28472
RS003	Transient receptor potential cation channel subfamily A member 1	TRPA1	O75762
RS003	Protein kinase C beta	PRKCB	P05771
RS003	GABA-B receptor	GABBR2	O75899
RS003	Phosphodiesterase 7A	PDE7A	Q13946
RS003	Progesterone receptor	PGR	P06401
RS003	Epoxide hydratase	EPHX2	P34913
RS003	Receptor protein-tyrosine kinase erbB-2	ERBB2	P04626
RS003	Serine/threonine-protein kinase Aurora-C	AURKC	Q9UQB9
RS003	Tyrosine-protein kinase BRK	PTK6	Q13882
RS003	Serine/threonine-protein kinase Aurora-A	AURKA	O14965
RS003	Activin receptor type-1	ACVR1	Q04771
RS003	LIM domain kinase 2	LIMK2	P53671
RS003	Cathepsin K	CTSK	P43235
RS003	Prostanoid EP1 receptor	PTGER1	P34995
RS003	CaM kinase II	CAMK2D	Q13557
RS003	Metabotropic glutamate receptor 5 (by homology)	GRM5	P41594
RS003	Glyceraldehyde-3-phosphate dehydrogenase liver	GAPDH	P04406
RS003	Serum albumin	ALB	P02768
RS003	Pyruvate kinase isozymes M1/M2	PKM	P14618
RS003	Cyclin-dependent kinase 4/cyclin D1	CCND1	P24385
RS003	Potassium-transporting ATPase	ATP4B	P51164
RS003	Serine/threonine-protein kinase PIM1	PIM1	P11309
RS003	Protein kinase C alpha	PRKCA	P17252
RS003	Protein kinase C epsilon	PRKCE	Q02156
RS003	NAD-dependent deacetylase sirtuin 2	SIRT2	Q8IXJ6
RS003	Toll-like receptor (TLR7/TLR9)	TLR9	Q9NR96
RS003	Protein kinase C gamma (by homology)	PRKCG	P05129
RS003	Tyrosine-protein kinase ITK/TSK	ITK	Q08881
RS003	Neuropeptide Y receptor type 5	NPY5R	Q15761
RS003	Indoleamine 2,3-dioxygenase	IDO1	P14902
RS003	11-beta-hydroxysteroid dehydrogenase 1	HSD11B1	P28845
RS003	Melatonin receptor 1A	MTNR1A	P48039
RS003	Melatonin receptor 1B	MTNR1B	P49286
RS003	Carbonic anhydrase IV	CA4	P22748
RS003	Androgen Receptor	AR	P10275
RS003	Histone deacetylase 1	HDAC1	Q13547
RS003	Thromboxane A2 receptor	TBXA2R	P21731
RS003	Nischarin	NISCH	Q9Y2I1
RS003	Rho-associated protein kinase 2	ROCK2	O75116
RS003	Rho-associated protein kinase 1	ROCK1	Q13464
RS003	Estrogen receptor alpha	ESR1	P03372
RS003	Dopamine D1 receptor	DRD1	P21728
RS003	Estrogen receptor beta	ESR2	Q92731
RS003	Glutaminyl-peptide cyclotransferase	QPCT	Q16769
RS003	Cyclin-dependent kinase 2/cyclin E	CCNE2	O96020
RS003	Bromodomain-containing protein 4	BRD4	O60885
RS003	Glycogen synthase kinase-3 beta	GSK3B	P49841
RS003	Acid ceramidase	ASAH1	Q13510
RS003	c-Jun N-terminal kinase 1	MAPK8	P45983
RS003	Melanocortin receptor 4	MC4R	P32245
RS003	c-Jun N-terminal kinase 3	MAPK10	P53779
RS003	Hepatocyte growth factor receptor	MET	P08581
RS003	Signal transducer and activator of transcription 3	STAT3	P40763
RS003	c-Jun N-terminal kinase 2	MAPK9	P45984
RS003	Cyclin-dependent kinase 2/cyclin E1	CCNE1	P24864
RS003	Potassium channel subfamily K member 3	KCNK3	O14649
RS003	Leukocyte common antigen	PTPRC	P08575
RS003	Dual specificity phosphatase Cdc25B	CDC25B	P30305
RS003	Cyclin-dependent kinase 2/cyclin A	CDK2	P24941
RS003	Protein kinase C theta	PRKCQ	Q04759
RS003	Cyclin-dependent kinase 2	CDK2	P24941
RS003	Histamine H4 receptor	HRH4	Q9H3N8
RS003	Dopamine D5 receptor	DRD5	P21918
RS003	Myeloperoxidase	MPO	P05164
RS003	Beta secretase 2	BACE2	Q9Y5Z0
RS003	MAP kinase p38 alpha	MAPK14	Q16539
RS003	Serine/threonine-protein kinase PLK4	PLK4	O00444
RS003	Beta-secretase 1	BACE1	P56817
RS003	Serine/threonine-protein kinase PLK2	PLK2	Q9NYY3
RS003	Histone deacetylase 3	HDAC3	O15379
RS003	Kinesin-1 heavy chain/ Tyrosine-protein kinase receptor RET	RET	P07949
RS003	Phosphodiesterase 4B	PDE4B	Q07343
RS003	Mitogen-activated protein kinase kinase kinase 8	MAP3K8	P41279
RS003	Kinesin-like protein KIF20A	KIF20A	O95235
RS003	Sodium/hydrogen exchanger 1	SLC9A1	P19634
RS003	Nicotinamide phosphoribosyltransferase	NAMPT	P43490
RS003	Cyclophilin A (by homology)	PPIA	P62937
RS003	Cathepsin L	CTSL	P07711
RS003	Cathepsin (B and K)	CTSB	P07858
RS003	Glutamate NMDA receptor; GRIN1/GRIN2B	GRIN1	Q05586
RS003	Protein kinase C delta	PRKCD	Q05655
RS003	Microtubule-associated protein tau	MAPT	P10636
RS003	Telomerase reverse transcriptase	TERT	O14746
RS003	Fibroblast growth factor receptor 1	FGFR1	P11362
RS003	Proteinase-activated receptor 1	F2R	P25116
RS003	Tyrosine-protein kinase JAK1	JAK1	P23458
RS003	Poly [ADP-ribose] polymerase-1	PARP1	P09874
RS003	Nitric-oxide synthase, brain	NOS1	P29475
RS003	Estradiol 17-beta-dehydrogenase 3	HSD17B3	P37058
RS003	Nitric oxide synthase, inducible	NOS2	P35228
RS003	Dopamine beta-hydroxylase	DBH	P09172
RS003	TGF-beta receptor type I	TGFBR1	P36897
RS003	Vascular endothelial growth factor receptor 1	FLT1	P17948
RS004	Egl nine homolog 1	EGLN1	Q9GZT9
RS004	Histone deacetylase 3	HDAC3	O15379
RS004	Histone lysine demethylase PHF8	PHF8	Q9UPP1
RS004	ATP-citrate synthase	ACLY	P53396
RS004	Protein farnesyltransferase	FNTA	P49354
RS004	GABA transporter 1	SLC6A1	P30531
RS004	GABA-A receptor; alpha-1/beta-2/gamma-2	GABRA1	P14867
RS004	GABA A receptor alpha-3/beta-2/gamma-2	GABRA3	P34903
RS004	GABA A receptor alpha-2/beta-2/gamma-2	GABRA2	P47869
RS004	GABA-B receptor	GABBR2	O75899
RS004	GABA receptor rho-1 subunit	GABRR1	P24046
RS004	GABA transporter 3	SLC6A11	P48066
RS004	Solute carrier family 22 member 6 (by homology)	SLC22A6	Q4U2R8
RS004	GABA transporter 2 (by homology)	SLC6A13	Q9NSD5
RS004	Hydroxyacid oxidase 1	HAO1	Q9UJM8
RS004	Fatty acid binding protein adipocyte	FABP4	P15090
RS004	Peroxisome proliferator-activated receptor alpha	PPARA	Q07869
RS004	Fatty acid binding protein muscle	FABP3	P05413
RS004	Fatty acid binding protein epidermal	FABP5	Q01469
RS004	Peroxisome proliferator-activated receptor delta	PPARD	Q03181
RS004	Free fatty acid receptor 1	FFAR1	O14842
RS004	Fatty acid binding protein intestinal	FABP2	P12104
RS004	HMG-CoA reductase	HMGCR	P04035
RS004	11-beta-hydroxysteroid dehydrogenase 1	HSD11B1	P28845
RS004	Prostanoid EP2 receptor	PTGER2	P43116
RS004	Prostanoid FP receptor	PTGFR	P43088
RS004	Neuronal acetylcholine receptor protein alpha-7 subunit (by homology)	CHRNA7	P36544
RS004	Squalene synthetase (by homology)	FDFT1	P37268
RS004	Androgen Receptor	AR	P10275
RS004	Vitamin D receptor	VDR	P11473
RS004	Niemann-Pick C1-like protein 1	NPC1L1	Q9UHC9
RS004	Bile acid receptor FXR	NR1H4	Q96RI1
RS004	Dual specificity phosphatase Cdc25A	CDC25A	P30304
RS004	G-protein coupled bile acid receptor 1	GPBAR1	Q8TDU6
RS004	Aldo-keto reductase family 1 member B10	AKR1B10	O60218
RS004	DNA polymerase beta (by homology)	POLB	P06746
RS004	Lysine-specific demethylase 3A	KDM3A	Q9Y4C1
RS004	Alpha-ketoglutarate-dependent dioxygenase FTO	FTO	Q9C0B1
RS004	Lysine-specific demethylase 5A	KDM5A	P29375
RS004	Hypoxia-inducible factor prolyl hydroxylase 1	EGLN2	Q96KS0
RS004	Lysine-specific demethylase 5B	KDM5B	Q9UGL1
RS004	Egl nine homolog 3	EGLN3	Q9H6Z9
RS004	Lysine-specific demethylase 4A	KDM4A	O75164
RS004	Hypoxia-inducible factor 1-alpha inhibitor	HIF1AN	Q9NWT6
RS004	Lysine-specific demethylase 4D	KDM4D	Q6B0I6
RS004	Lysine-specific demethylase 4C	KDM4C	Q9H3R0
RS004	Carbonic anhydrase I	CA1	P00915
RS004	Carbonic anhydrase IX	CA9	Q16790
RS004	Aminopeptidase B	RNPEP	Q9H4A4
RS004	UDP-glucuronosyltransferase 2B7	UGT2B7	P16662
RS004	Lysine-specific demethylase 6B	KDM6B	O15054
RS004	Glutamate carboxypeptidase II	FOLH1	Q04609
RS004	Cytochrome P450 19A1	CYP19A1	P11511
RS004	Corticosteroid binding globulin	SERPINA6	P08185
RS004	Testis-specific androgen-binding protein	SHBG	P04278
RS004	Estradiol 17-beta-dehydrogenase 3	HSD17B3	P37058
RS004	Glucose-6-phosphate 1-dehydrogenase	G6PD	P11413
RS004	GABA-B receptor (by homology)	GABBR1	Q9UBS5
RS004	Lysine-specific demethylase 2A	KDM2A	Q9Y2K7
RS004	Lysine-specific demethylase 5C	KDM5C	P41229
RS004	Angiotensin-converting enzyme (by homology)	ACE	P12821
RS004	Lysine-specific demethylase 4D-like	KDM4E	B2RXH2
RS005	Peroxisome proliferator-activated receptor alpha	PPARA	Q07869
RS005	Cannabinoid receptor 2	CNR2	P34972
RS005	Anandamide amidohydrolase	FAAH	O00519
RS005	Vanilloid receptor	TRPV1	Q8NER1
RS005	LXR-alpha	NR1H3	Q13133
RS005	Squalene monooxygenase	SQLE	Q14534
RS005	Nuclear receptor subfamily 1 group I member 3 (by homology)	NR1I3	Q14994
RS005	Androgen Receptor (by homology)	AR	P10275
RS005	Cytochrome P450 19A1	CYP19A1	P11511
RS005	Estrogen receptor alpha	ESR1	P03372
RS005	Muscarinic acetylcholine receptor M2	CHRM2	P08172
RS005	Norepinephrine transporter	SLC6A2	P23975
RS005	Serotonin transporter	SLC6A4	P31645
RS005	Cytochrome P450 2C19	CYP2C19	P33261
RS005	DNA topoisomerase I	TOP1	P11387
RS005	Estrogen receptor beta	ESR2	Q92731
RS005	Butyrylcholinesterase	BCHE	P06276
RS005	Protein-tyrosine phosphatase 1B	PTPN1	P18031
RS005	C-X-C chemokine receptor type 3	CXCR3	P49682
RS005	T-cell protein-tyrosine phosphatase	PTPN2	P17706
RS005	Cyclooxygenase-1	PTGS1	P23219
RS005	Monoamine oxidase B	MAOB	P27338
RS005	Adenosine A1 receptor	ADORA1	P30542
RS005	Adenosine A2a receptor	ADORA2A	P29274
RS005	Adenosine A3 receptor	ADORA3	P0DMS8
RS005	UDP-glucuronosyltransferase 2B7	UGT2B7	P16662
RS005	Zinc finger protein GLI2	GLI2	P10070
RS005	Zinc finger protein GLI1	GLI1	P08151
RS005	Nuclear receptor ROR-gamma	RORC	P51449
RS005	Sterol regulatory element-binding protein 2	SREBF2	Q12772
RS005	Niemann-Pick C1-like protein 1	NPC1L1	Q9UHC9
RS005	Fatty acid binding protein adipocyte	FABP4	P15090
RS005	Peroxisome proliferator-activated receptor gamma	PPARG	P37231
RS005	Cathepsin D	CTSD	P07339
RS005	Telomerase reverse transcriptase	TERT	O14746
RS005	Testis-specific androgen-binding protein	SHBG	P04278
RS005	Fatty acid binding protein muscle	FABP3	P05413
RS005	Cytochrome P450 17A1	CYP17A1	P05093
RS005	Fatty acid binding protein epidermal	FABP5	Q01469
RS005	Peroxisome proliferator-activated receptor delta	PPARD	Q03181
RS005	HMG-CoA reductase	HMGCR	P04035
RS005	Fatty acid-binding protein, liver	FABP1	P07148
RS005	Cannabinoid receptor 1 (by homology)	CNR1	P21554
RS005	Cytochrome P450 51 (by homology)	CYP51A1	Q16850
RS005	Steroid 5-alpha-reductase 1	SRD5A1	P18405
RS005	Steroid 5-alpha-reductase 2	SRD5A2	P31213
RS005	Mineralocorticoid receptor	NR3C2	P08235
RS005	Glucocorticoid receptor	NR3C1	P04150
RS005	Progesterone receptor	PGR	P06401
RS005	Acyl coenzyme A:cholesterol acyltransferase	CES1	P23141
RS005	Corticosteroid binding globulin	SERPINA6	P08185
RS005	Sigma opioid receptor	SIGMAR1	Q99720
RS005	Pregnane X receptor	NR1I2	O75469
RS005	Estradiol 17-beta-dehydrogenase 3	HSD17B3	P37058
RS005	Acyl-CoA desaturase	SCD	O00767
RS005	Acetylcholinesterase	ACHE	P22303
RS005	Arachidonate 5-lipoxygenase	ALOX5	P09917
RS005	Plasma retinol-binding protein	RBP4	P02753
RS005	Protein-tyrosine phosphatase 1C	PTPN6	P29350
RS005	Transient receptor potential cation channel subfamily A member 1	TRPA1	O75762
RS005	C-C chemokine receptor type 5	CCR5	P51681
RS005	Lanosterol synthase	LSS	P48449
RS005	Squalene synthetase (by homology)	FDFT1	P37268
RS005	Prostanoid EP1 receptor (by homology)	PTGER1	P34995
RS005	Prostanoid EP2 receptor (by homology)	PTGER2	P43116
RS005	Carboxylesterase 2	CES2	O00748
RS005	Prolyl endopeptidase	PREP	P48147
RS005	Free fatty acid receptor 1	FFAR1	O14842
RS005	Prostaglandin E synthase	PTGES	O14684
RS005	Vitamin D receptor	VDR	P11473
RS005	Retinoic acid receptor gamma	RARG	P13631
RS005	Retinoic acid receptor beta	RARB	P10826
RS005	Retinoic acid receptor alpha	RARA	P10276
RS005	Sphingosine kinase 2	SPHK2	Q9NRA0
RS005	Cytosolic phospholipase A2	PLA2G4A	P47712
RS005	Sphingosine kinase 1	SPHK1	Q9NYA1
RS005	Nuclear receptor ROR-alpha	RORA	P35398
RS005	Protein farnesyltransferase	FNTA	P49354
RS006	UDP-glucuronosyltransferase 2B7	UGT2B7	P16662
RS006	Transient receptor potential cation channel subfamily M member 8	TRPM8	Q7Z2W7
RS006	Carbonic anhydrase II	CA2	P00918
RS006	Carbonic anhydrase I	CA1	P00915
RS006	Carbonic anhydrase IV	CA4	P22748
RS006	Dual specificity phosphatase Cdc25A	CDC25A	P30304
RS006	Dual specificity phosphatase Cdc25B	CDC25B	P30305
RS006	DNA polymerase alpha subunit	POLA1	P09884
RS006	Androgen Receptor	AR	P10275
RS006	11-beta-hydroxysteroid dehydrogenase 1	HSD11B1	P28845
RS006	Bile acid receptor FXR	NR1H4	Q96RI1
RS006	Sonic hedgehog protein (by homology)	SHH	Q15465
RS006	Testis-specific androgen-binding protein	SHBG	P04278
RS006	Estrogen receptor alpha	ESR1	P03372
RS006	Estrogen receptor beta	ESR2	Q92731
RS006	Nuclear receptor subfamily 1 group I member 3	NR1I3	Q14994
RS006	Niemann-Pick C1-like protein 1	NPC1L1	Q9UHC9
RS006	Indoleamine 2,3-dioxygenase	IDO1	P14902
RS006	G-protein coupled bile acid receptor 1	GPBAR1	Q8TDU6
RS006	Dopamine transporter (by homology)	SLC6A3	Q01959
RS006	Serotonin transporter (by homology)	SLC6A4	P31645
RS006	Polyadenylate-binding protein 1	PABPC1	P11940
RS006	Glucocorticoid receptor	NR3C1	P04150
RS006	Cytochrome P450 19A1	CYP19A1	P11511
RS006	Cytochrome P450 17A1	CYP17A1	P05093
RS006	Isoprenylcysteine carboxyl methyltransferase	ICMT	O60725
RS006	Eukaryotic translation initiation factor 2-alpha kinase 1	EIF2AK1	Q9BQI3
RS006	Monoacylglycerol lipase ABHD6	ABHD6	Q9BV23
RS006	Cyclooxygenase-2	PTGS2	P35354
RS006	Mineralocorticoid receptor	NR3C2	P08235
RS006	Progesterone receptor	PGR	P06401
RS006	LXR-alpha	NR1H3	Q13133
RS006	Cannabinoid receptor 1	CNR1	P21554
RS006	Cannabinoid receptor 2	CNR2	P34972
RS006	Ileal bile acid transporter	SLC10A2	Q12908
RS006	Histamine H3 receptor	HRH3	Q9Y5N1
RS006	Estradiol 17-beta-dehydrogenase 2	HSD17B2	P37059
RS006	Sigma opioid receptor	SIGMAR1	Q99720
RS006	Melatonin receptor 1A	MTNR1A	P48039
RS006	Glucose-6-phosphate 1-dehydrogenase	G6PD	P11413
RS006	GABA-B receptor (by homology)	GABBR1	Q9UBS5
RS006	Vesicular acetylcholine transporter	SLC18A3	Q16572
RS006	Norepinephrine transporter	SLC6A2	P23975
RS006	Arachidonate 5-lipoxygenase	ALOX5	P09917
RS006	Oxytocin receptor (by homology)	OXTR	P30559
RS006	Hypoxia-inducible factor 1 alpha	HIF1A	Q16665
RS006	Gamma-secretase	PSEN2	P49810
RS006	PI3-kinase p110-beta subunit	PIK3CB	P42338
RS006	PI3-kinase p110-alpha subunit	PIK3CA	P42336
RS006	Voltage-gated potassium channel subunit Kv1.5	KCNA5	P22460
RS006	Muscarinic acetylcholine receptor M2	CHRM2	P08172
RS006	Muscarinic acetylcholine receptor M1	CHRM1	P11229
RS006	Muscarinic acetylcholine receptor M3	CHRM3	P20309
RS006	Transient receptor potential cation channel subfamily V member 3	TRPV3	Q8NET8
RS006	Bromodomain-containing protein 4	BRD4	O60885
RS006	Bromodomain-containing protein 2	BRD2	P25440
RS006	Bromodomain-containing protein 3	BRD3	Q15059
RS006	Dual specificity protein kinase CLK4	CLK4	Q9HAZ1
RS006	P2X purinoceptor 7	P2RX7	Q99572
RS006	Period circadian protein homolog 2	PER2	O15055
RS006	Epoxide hydratase	EPHX2	P34913
RS006	LDL-associated phospholipase A2	PLA2G7	Q13093
RS006	Vanilloid receptor	TRPV1	Q8NER1
RS006	Melatonin receptor 1B	MTNR1B	P49286
RS006	Sodium channel protein type V alpha subunit	SCN5A	Q14524
RS006	Sodium channel protein type IX alpha subunit	SCN9A	Q15858
RS006	Quinone reductase 2	NQO2	P16083
RS006	Nuclear receptor subfamily 4 group A member 1	NR4A1	P22736
RS006	Neuropeptide Y receptor type 5	NPY5R	Q15761
RS006	Neuropeptide Y receptor type 2	NPY2R	P49146
RS006	Voltage-gated potassium channel subunit Kv1.3	KCNA3	P22001
RS006	PI3-kinase p110-delta subunit	PIK3CD	O00329
RS006	Geranylgeranyl transferase type I beta subunit	PGGT1B	P53609
RS006	Vitamin D receptor	VDR	P11473
RS006	GABA A receptor alpha-2/beta-2/gamma-2	GABRA2	P47869
RS006	Aldo-keto reductase family 1 member B10	AKR1B10	O60218
RS006	DNA polymerase beta (by homology)	POLB	P06746
RS006	Cytochrome P450 51 (by homology)	CYP51A1	Q16850
RS006	Vasopressin V1a receptor	AVPR1A	P37288
RS006	Poly [ADP-ribose] polymerase-1	PARP1	P09874
RS006	Lysosomal acid lipase/cholesteryl ester hydrolase	LIPA	P38571
RS006	Alpha-1a adrenergic receptor	ADRA1A	P35348
RS006	DNA-dependent protein kinase	PRKDC	P78527
RS006	Serine/threonine-protein kinase PIM1	PIM1	P11309
RS006	Adenosine A1 receptor (by homology)	ADORA1	P30542
RS006	Adenosine A2a receptor (by homology)	ADORA2A	P29274
RS006	Adenosine A3 receptor	ADORA3	P0DMS8
RS006	MAP kinase p38 alpha	MAPK14	Q16539
RS006	Serine/threonine-protein kinase PIM2	PIM2	Q9P1W9
RS006	11-beta-hydroxysteroid dehydrogenase 2	HSD11B2	P80365
RS006	Methionine aminopeptidase 2	METAP2	P50579
RS006	Cytochrome P450 11B1	CYP11B1	P15538
RS006	C5a anaphylatoxin chemotactic receptor	C5AR1	P21730
RS006	Cytochrome P450 11B2	CYP11B2	P19099
RS006	Hormone sensitive lipase	LIPE	Q05469
RS006	C-C chemokine receptor type 1	CCR1	P32246
RS006	Protein tyrosine kinase 2 beta	PTK2B	Q14289
RS006	EZH2/SUZ12/EED/RBBP7/RBBP4	EZH2	Q15910
RS006	Delta opioid receptor	OPRD1	P41143
RS006	Kappa Opioid receptor	OPRK1	P41145
RS007	Mu opioid receptor (by homology)	OPRM1	P35372
RS007	Delta opioid receptor (by homology)	OPRD1	P41143
RS007	Kappa Opioid receptor	OPRK1	P41145
RS007	Sodium/glucose cotransporter 2	SLC5A2	P31639
RS007	Serine/threonine-protein kinase PAK 1	PAK1	Q13153
RS007	Cathepsin L	CTSL	P07711
RS007	MAP kinase p38 alpha	MAPK14	Q16539
RS007	Sphingosine 1-phosphate receptor Edg-3	S1PR3	Q99500
RS007	Sphingosine 1-phosphate receptor Edg-1	S1PR1	P21453
RS007	Androgen Receptor	AR	P10275
RS007	Cyclin-dependent kinase 2	CDK2	P24941
RS007	Cyclin-dependent kinase 1	CDK1	P06493
RS007	Phosphodiesterase 4B (by homology)	PDE4B	Q07343
RS007	Vascular endothelial growth factor receptor 2	KDR	P35968
RS007	Phosphodiesterase 7A	PDE7A	Q13946
RS007	Estradiol 17-beta-dehydrogenase 2	HSD17B2	P37059
RS007	Estradiol 17-beta-dehydrogenase 1	HSD17B1	P14061
RS007	Phospholipase A2 group IIA	PLA2G2A	P14555
RS007	Phospholipase A2 group 1B	PLA2G1B	P04054
RS007	Hepatocyte growth factor receptor	MET	P08581
RS007	Cannabinoid receptor 2	CNR2	P34972
RS007	Plasma retinol-binding protein	RBP4	P02753
RS007	Cyclin T1	CCNT1	O60563
RS007	Macrophage colony stimulating factor receptor	CSF1R	P07333
RS007	Smoothened homolog	SMO	Q99835
RS007	Glucocorticoid receptor	NR3C1	P04150
RS007	Serine/threonine-protein kinase mTOR	MTOR	P42345
RS007	PI3-kinase p110-alpha subunit	PIK3CA	P42336
RS007	Perforin-1	PRF1	P14222
RS007	Liver glycogen phosphorylase	PYGL	P06737
RS007	Serine/threonine-protein kinase Chk1	CHEK1	O14757
RS007	LIM domain kinase 2	LIMK2	P53671
RS007	Tyrosine-protein kinase TYK2	TYK2	P29597
RS007	GABA receptor alpha-5 subunit	GABRA5	P31644
RS007	Acyl-CoA desaturase	SCD	O00767
RS007	Lysyl-tRNA synthetase	KARS	Q15046
RS007	Bromodomain-containing protein 4	BRD4	O60885
RS007	Bromodomain-containing protein 2	BRD2	P25440
RS007	Bromodomain-containing protein 3	BRD3	Q15059
RS007	Tyrosine-protein kinase ABL	ABL1	P00519
RS007	Cyclin-dependent kinase 5/CDK5 activator 1	CDK5R1	Q15078
RS007	Cyclin-dependent kinase 4/cyclin D1	CCND1	P24385
RS007	Epidermal growth factor receptor erbB1	EGFR	P00533
RS007	Cyclin-dependent kinase 1/cyclin B	CCNB3	Q8WWL7
RS007	Cyclin-dependent kinase 2/cyclin A	CDK2	P24941
RS007	Cyclin-dependent kinase 7/ cyclin H	CDK7	P50613
RS007	CDK6/cyclin D3	CCND3	P30281
RS007	Adenosine A1 receptor	ADORA1	P30542
RS007	Adenosine A3 receptor	ADORA3	P0DMS8
RS007	Cathepsin (B and K)	CTSB	P07858
RS007	Acetyl-CoA carboxylase 2	ACACB	O00763
RS007	Hypoxia-inducible factor 1 alpha	HIF1A	Q16665
RS007	Mitogen-activated protein kinase kinase kinase 14	MAP3K14	Q99558
RS007	Glycogen synthase kinase-3 beta	GSK3B	P49841
RS007	Cyclin-dependent kinase 9	CDK9	P50750
RS007	Caspase-3	CASP3	P42574
RS007	Caspase-7	CASP7	P55210
RS007	Runt-related transcription factor 1/Core-binding factor subunit beta	CBFB	Q13951
RS007	Lysine-specific demethylase 5A	KDM5A	P29375
RS007	Dopamine D2 receptor (by homology)	DRD2	P14416
RS007	Tyrosine-protein kinase SYK	SYK	P43405
RS007	Alkaline phosphatase, tissue-nonspecific isozyme	ALPL	P05186
RS007	Insulin receptor	INSR	P06213
RS007	GABA-A receptor; alpha-3/beta-3/gamma-2	GABRB3	P28472
RS007	GABA-A receptor; alpha-1/beta-3/gamma-2	GABRB3	P28472
RS007	GABA-A receptor; alpha-5/beta-3/gamma-2	GABRB3	P28472
RS007	GABA-A receptor; alpha-2/beta-3/gamma-2	GABRA2	P47869
RS007	Platelet-derived growth factor receptor	PDGFRA	P16234
RS007	Focal adhesion kinase 1	PTK2	Q05397
RS007	Tyrosine-protein kinase JAK2	JAK2	O60674
RS007	Fibroblast growth factor receptor 1	FGFR1	P11362
RS007	Fibroblast growth factor receptor 2	FGFR2	P21802
RS007	Intercellular adhesion molecule (ICAM-1), Integrin alpha-L/beta-2	ITGAL	P20701
RS007	Arachidonate 5-lipoxygenase	ALOX5	P09917
RS007	Muscle glycogen synthase	GYS1	P13807
RS007	Monoglyceride lipase	MGLL	Q99685
RS007	Tyrosine-protein kinase JAK3	JAK3	P52333
RS007	Tyrosine-protein kinase JAK1	JAK1	P23458
RS007	Uridine phosphorylase 1 (by homology)	UPP1	Q16831
RS007	Serine/threonine-protein kinase Aurora-B	AURKB	Q96GD4
RS007	Serine/threonine-protein kinase Aurora-A	AURKA	O14965
RS007	Nicotinamide phosphoribosyltransferase	NAMPT	P43490
RS007	Serine/threonine-protein kinase SMG1	SMG1	Q96Q15
RS007	Phosphoglycerate kinase 1	PGK1	P00558
RS007	Cholesteryl ester transfer protein	CETP	P11597
RS007	Phosphodiesterase 10A (by homology)	PDE10A	Q9Y233
RS007	Prostanoid EP1 receptor	PTGER1	P34995
RS007	Receptor protein-tyrosine kinase erbB-2	ERBB2	P04626
RS007	Thymidylate synthase (by homology)	TYMS	P04818
RS007	Niemann-Pick C1-like protein 1	NPC1L1	Q9UHC9
RS007	Acetylcholinesterase	ACHE	P22303
RS007	Histone deacetylase 8	HDAC8	Q9BY41
RS007	Histone deacetylase 1	HDAC1	Q13547
RS007	Tyrosine-protein kinase receptor FLT3	FLT3	P36888
RS007	Glutamate receptor ionotropic, AMPA 1	GRIA1	P42261
RS007	Serotonin 2c (5-HT2c) receptor	HTR2C	P28335
RS007	PI3-kinase p110-beta subunit	PIK3CB	P42338
RS007	Melanin-concentrating hormone receptor 1	MCHR1	Q99705
RS007	Inhibitor of nuclear factor kappa B kinase epsilon subunit	IKBKE	Q14164
RS007	Vanilloid receptor	TRPV1	Q8NER1
RS008	Signal transducer and activator of transcription 3	STAT3	P40763
RS008	Interleukin-2	IL2	P60568
RS008	Platelet activating factor receptor	PTAFR	P25105
RS008	Heat shock protein HSP 90-alpha	HSP90AA1	P07900
RS008	Gamma-secretase	PSEN2	P49810
RS008	Vascular endothelial growth factor A	VEGFA	P15692
RS008	Acidic fibroblast growth factor	FGF1	P05230
RS008	Basic fibroblast growth factor	FGF2	P09038
RS008	Heparanase	HPSE	Q9Y251
RS008	Sodium/potassium-transporting ATPase alpha-1 chain	ATP1A1	P05023
RS008	Nuclear receptor ROR-gamma	RORC	P51449
RS008	Thymidylate synthase (by homology)	TYMS	P04818
RS008	Apoptosis regulator Bcl-X	BCL2L1	Q07817
RS008	Tyrosine-protein kinase receptor TYRO3	TYRO3	Q06418
RS008	Galectin-4	LGALS4	P56470
RS008	Galectin-3	LGALS3	P17931
RS008	Galectin-8	LGALS8	O00214
RS008	Cyclin-dependent kinase 1	CDK1	P06493
RS008	Sphingosine 1-phosphate receptor Edg-3	S1PR3	Q99500
RS008	Sphingosine 1-phosphate receptor Edg-1	S1PR1	P21453
RS008	Serine/threonine-protein kinase PLK1	PLK1	P53350
RS008	Matrix metalloproteinase 13	MMP13	P45452
RS008	Matrix metalloproteinase 1	MMP1	P03956
RS008	ADAM17	ADAM17	P78536
RS008	Tyrosine-protein kinase JAK2	JAK2	O60674
RS008	11-beta-hydroxysteroid dehydrogenase 2	HSD11B2	P80365
RS008	Vascular endothelial growth factor receptor 2	KDR	P35968
RS008	Beta-secretase 1	BACE1	P56817
RS008	Acetyl-CoA carboxylase 2	ACACB	O00763
RS008	Histone deacetylase 6	HDAC6	Q9UBN7
RS008	Cytochrome P450 2C9	CYP2C9	P11712
RS008	Cytochrome P450 3A4	CYP3A4	P08684
RS008	Cytochrome P450 2C19	CYP2C19	P33261
RS008	Vascular endothelial growth factor receptor 1	FLT1	P17948
RS008	Histone deacetylase 1	HDAC1	Q13547
RS008	5-lipoxygenase activating protein	ALOX5AP	P20292
RS008	MAP kinase p38 alpha	MAPK14	Q16539
RS008	Pyruvate dehydrogenase kinase isoform 1	PDK1	Q15118
RS008	Glucocorticoid receptor	NR3C1	P04150
RS008	Matrix metalloproteinase 9	MMP9	P14780
RS008	Estrogen-related receptor alpha	ESRRA	P11474
RS008	Estrogen-related receptor beta	ESRRB	O95718
RS008	Histone deacetylase 2	HDAC2	Q92769
RS008	Histone deacetylase 3/Nuclear receptor corepressor 2 (HDAC3/NCoR2)	NCOR2	Q9Y618
RS008	Histone deacetylase 5	HDAC5	Q9UQL6
RS008	Histone deacetylase 8	HDAC8	Q9BY41
RS008	Histone deacetylase 11	HDAC11	Q96DB2
RS008	Histone deacetylase 10	HDAC10	Q969S8
RS008	Diacylglycerol O-acyltransferase 1	DGAT1	O75907
RS008	11-beta-hydroxysteroid dehydrogenase 1	HSD11B1	P28845
RS008	Serine/threonine-protein kinase Aurora-B	AURKB	Q96GD4
RS008	Ribosomal protein S6 kinase 1	RPS6KB1	P23443
RS008	Serine/threonine-protein kinase Aurora-A	AURKA	O14965
RS008	Lethal(3)malignant brain tumor-like protein 3	L3MBTL3	Q96JM7
RS008	Adrenergic receptor beta	ADRB2	P07550
RS008	Beta-1 adrenergic receptor	ADRB1	P08588
RS008	Beta-3 adrenergic receptor	ADRB3	P13945
RS008	Tyrosine-protein kinase LCK	LCK	P06239
RS008	Tyrosine-protein kinase HCK	HCK	P08631
RS008	Serine/threonine-protein kinase AKT2	AKT2	P31751
RS008	Matrix metalloproteinase 2	MMP2	P08253
RS008	Serine/threonine-protein kinase AKT	AKT1	P31749
RS008	Monoamine oxidase A	MAOA	P21397
RS008	Monoamine oxidase B	MAOB	P27338
RS008	Renin	REN	P00797
RS008	Macrophage colony stimulating factor receptor	CSF1R	P07333
RS008	Stem cell growth factor receptor	KIT	P10721
RS008	Tyrosine-protein kinase receptor FLT3	FLT3	P36888
RS008	6-phosphofructo-2-kinase/fructose-2,6-bisphosphatase 3	PFKFB3	Q16875
RS008	Low molecular weight phosphotyrosine protein phosphatase	ACP1	P24666
RS008	Hepatocyte growth factor receptor	MET	P08581
RS008	Niemann-Pick C1 protein	NPC1	O15118
RS008	Acyl-CoA desaturase	SCD	O00767
RS008	Cytosolic phospholipase A2	PLA2G4A	P47712
RS008	Androgen Receptor	AR	P10275
RS008	Histamine H3 receptor	HRH3	Q9Y5N1
RS008	Protein-tyrosine phosphatase 2C	PTPN11	Q06124
RS008	Lysophosphatidic acid receptor 4	LPAR4	Q99677
RS008	SUMO-activating enzyme subunit 1	SAE1	Q9UBE0
RS008	Serotonin 1a (5-HT1a) receptor	HTR1A	P08908
RS008	Serotonin transporter	SLC6A4	P31645
RS008	Dual specificity phosphatase Cdc25C	CDC25C	P30307
RS008	Histone acetyltransferase p300	EP300	Q09472
RS008	Histone acetyltransferase PCAF	KAT2B	Q92831
RS008	Sphingosine 1-phosphate receptor Edg-8	S1PR5	Q9H228
RS008	Sphingosine 1-phosphate receptor Edg-6	S1PR4	O95977
RS008	Acetylcholinesterase	ACHE	P22303
RS008	c-Jun N-terminal kinase 1	MAPK8	P45983
RS008	c-Jun N-terminal kinase 2	MAPK9	P45984
RS008	Mitogen-activated protein kinase kinase kinase kinase 4	MAP4K4	O95819
RS008	Adenosine A2a receptor (by homology)	ADORA2A	P29274
RS008	Perforin-1	PRF1	P14222
RS008	Dopamine transporter (by homology)	SLC6A3	Q01959
RS008	Histone deacetylase 3	HDAC3	O15379
RS008	Integrin alpha-V/beta-3	ITGAV	P06756
RS008	Estrogen receptor alpha	ESR1	P03372
RS008	C-C chemokine receptor type 1	CCR1	P32246
RS008	C-C chemokine receptor type 3	CCR3	P51677
RS008	Transitional endoplasmic reticulum ATPase	VCP	P55072
RS008	Butyrylcholinesterase	BCHE	P06276
RS009	Serotonin 2b (5-HT2b) receptor	HTR2B	P41595
RS009	Alpha-2a adrenergic receptor	ADRA2A	P08913
RS009	Adrenergic receptor alpha-2	ADRA2C	P18825
RS009	Alpha-2b adrenergic receptor	ADRA2B	P18089
RS009	Dopamine D1 receptor	DRD1	P21728
RS009	Dopamine D2 receptor	DRD2	P14416
RS009	Alpha-1d adrenergic receptor	ADRA1D	P25100
RS009	Serotonin 2a (5-HT2a) receptor	HTR2A	P28223
RS009	Serotonin 2c (5-HT2c) receptor	HTR2C	P28335
RS009	Dopamine D3 receptor	DRD3	P35462
RS009	Cytochrome P450 2D6	CYP2D6	P10635
RS009	Serotonin 6 (5-HT6) receptor	HTR6	P50406
RS009	Alpha-1a adrenergic receptor (by homology)	ADRA1A	P35348
RS009	Serotonin 1b (5-HT1b) receptor (by homology)	HTR1B	P28222
RS009	Nuclear receptor ROR-gamma	RORC	P51449
RS009	Cyclin-dependent kinase 1	CDK1	P06493
RS009	Signal transducer and activator of transcription 3	STAT3	P40763
RS009	Vascular endothelial growth factor A	VEGFA	P15692
RS009	Acidic fibroblast growth factor	FGF1	P05230
RS009	Heparanase	HPSE	Q9Y251
RS009	Glycine receptor subunit alpha-1	GLRA1	P23415
RS009	Glycine receptor subunit alpha-2	GLRA2	P23416
RS009	Protein phosphatase 2C alpha	PPM1A	P35813
RS009	Platelet activating factor receptor	PTAFR	P25105
RS009	Gamma-secretase	PSEN2	P49810
RS009	Galectin-4	LGALS4	P56470
RS009	Galectin-8	LGALS8	O00214
RS009	Vitamin D receptor	VDR	P11473
RS009	Basic fibroblast growth factor	FGF2	P09038
RS009	Kappa Opioid receptor	OPRK1	P41145
RS009	Maltase-glucoamylase	MGAM	O43451
RS009	11-beta-hydroxysteroid dehydrogenase 2	HSD11B2	P80365
RS009	11-beta-hydroxysteroid dehydrogenase 1	HSD11B1	P28845
RS009	Pancreatic alpha-amylase	AMY2A	P04746
RS009	AMY1C	AMY1A	P04745
RS009	Squalene synthetase (by homology)	FDFT1	P37268
RS009	Galectin-3	LGALS3	P17931
RS009	Motilin receptor	MLNR	O43193
RS009	HERG	KCNH2	Q12809
RS009	Adenosine A2a receptor (by homology)	ADORA2A	P29274
RS009	Glutamate carboxypeptidase II	FOLH1	Q04609
RS009	NAALADase II	NAALAD2	Q9Y3Q0
RS009	Heat shock protein HSP 90-alpha	HSP90AA1	P07900
RS009	Apoptosis regulator Bcl-X	BCL2L1	Q07817
RS009	Adenosine A1 receptor (by homology)	ADORA1	P30542
RS009	Folylpoly-gamma-glutamate synthetase	FPGS	Q05932
RS009	Sucrase-isomaltase	SI	P14410
RS009	Sialidase 3	NEU3	Q9UQ49
RS009	Sialidase 2	NEU2	Q9Y3R4
RS009	Sialidase 4	NEU4	Q8WWR8
RS009	Mu opioid receptor	OPRM1	P35372
RS009	Liver glycogen phosphorylase	PYGL	P06737
RS009	Muscle glycogen phosphorylase	PYGM	P11217
RS009	Bile salt export pump	ABCB11	O95342
RS009	Asparagine synthetase	ASNS	P08243
RS009	Adenosylhomocysteinase	AHCY	P23526
RS009	Telomerase reverse transcriptase	TERT	O14746
RS009	Inosine-5'-monophosphate dehydrogenase 1	IMPDH1	P20839
RS009	Inosine-5'-monophosphate dehydrogenase 2	IMPDH2	P12268
RS009	Hypoxanthine-guanine phosphoribosyltransferase	HPRT1	P00492
RS009	Adenosine A3 receptor	ADORA3	P0DMS8
RS009	DNA polymerase alpha subunit	POLA1	P09884
RS009	DNA polymerase beta	POLB	P06746
RS009	DNA polymerase gamma subunit 1	POLG	P54098
RS009	Purinergic receptor P2Y1	P2RY1	P47900
RS009	Alpha-L-fucosidase I	FUCA1	P04066
RS009	Adenylate cyclase type 10	ADCY10	Q96PN6
RS009	Protein phosphatase 2C beta	PPM1B	O75688
RS009	Protein-tyrosine phosphatase 1B	PTPN1	P18031
RS009	Serine/threonine protein phosphatase PP1-gamma catalytic subunit	PPP1CC	P36873
RS009	Serine/threonine protein phosphatase 2A, catalytic subunit, alpha isoform	PPP2CA	P67775
RS009	Serine/threonine protein phosphatase 2A, 56 kDa regulatory subunit, alpha isoform	PPP2R5A	Q15172
RS009	Transforming protein p21/H-Ras-1	HRAS	P01112
RS009	Protein kinase C alpha	PRKCA	P17252
RS009	Glutamate receptor ionotropic kainate 1	GRIK1	P39086
RS009	Equilibrative nucleoside transporter 1	SLC29A1	Q99808
RS009	Glutamate receptor ionotropic kainate 2	GRIK2	Q13002
RS009	Glutamate receptor ionotropic kainate 3	GRIK3	Q13003
RS009	Protein phosphatase 2A regulatory subunit B'	PTPA	Q15257
RS009	Glutaminyl-tRNA synthetase	QARS	P47897
RS009	6-phosphogluconate dehydrogenase	PGD	P52209
RS009	Trehalase	TREH	O43280
RS009	Epoxide hydratase	EPHX2	P34913
RS009	DNA polymerase delta subunit 1	POLD1	P28340
RS009	Vanilloid receptor	TRPV1	Q8NER1
RS009	Tyrosyl-tRNA synthetase	YARS	P54577
RS009	P-glycoprotein 1	ABCB1	P08183
RS009	Aldose reductase	AKR1B1	P15121
RS009	Protein kinase C gamma	PRKCG	P05129
RS009	Protein kinase C delta	PRKCD	Q05655
RS009	Protein kinase C beta	PRKCB	P05771
RS009	Protein kinase C epsilon	PRKCE	Q02156
RS009	Protein kinase C eta	PRKCH	P24723
RS009	Protein kinase C theta	PRKCQ	Q04759
RS009	Acidic mammalian chitinase	CHIA	Q9BZP6
RS009	Caspase-3	CASP3	P42574
RS009	Purinergic receptor P2Y11	P2RY11	Q96G91
RS009	Matrix metalloproteinase 13	MMP13	P45452
RS009	Matrix metalloproteinase 1	MMP1	P03956
RS009	Matrix metalloproteinase 7	MMP7	P09237
RS010	Signal transducer and activator of transcription 3	STAT3	P40763
RS010	Platelet activating factor receptor	PTAFR	P25105
RS010	Interleukin-2	IL2	P60568
RS010	Vascular endothelial growth factor A	VEGFA	P15692
RS010	Acidic fibroblast growth factor	FGF1	P05230
RS010	Basic fibroblast growth factor	FGF2	P09038
RS010	Heparanase	HPSE	Q9Y251
RS010	Nuclear receptor ROR-gamma	RORC	P51449
RS010	Sodium/potassium-transporting ATPase alpha-1 chain	ATP1A1	P05023
RS010	Gamma-secretase	PSEN2	P49810
RS010	Heat shock protein HSP 90-alpha	HSP90AA1	P07900
RS010	Galectin-4	LGALS4	P56470
RS010	Galectin-8	LGALS8	O00214
RS010	Apoptosis regulator Bcl-X	BCL2L1	Q07817
RS010	Cyclin-dependent kinase 1	CDK1	P06493
RS010	11-beta-hydroxysteroid dehydrogenase 2	HSD11B2	P80365
RS010	11-beta-hydroxysteroid dehydrogenase 1	HSD11B1	P28845
RS010	Vascular endothelial growth factor receptor 2	KDR	P35968
RS010	Serotonin 2b (5-HT2b) receptor	HTR2B	P41595
RS010	Alpha-2a adrenergic receptor	ADRA2A	P08913
RS010	Adrenergic receptor alpha-2	ADRA2C	P18825
RS010	Alpha-2b adrenergic receptor	ADRA2B	P18089
RS010	Dopamine D1 receptor	DRD1	P21728
RS010	Dopamine D2 receptor	DRD2	P14416
RS010	Alpha-1d adrenergic receptor	ADRA1D	P25100
RS010	Serotonin 2a (5-HT2a) receptor	HTR2A	P28223
RS010	Serotonin 2c (5-HT2c) receptor	HTR2C	P28335
RS010	Alpha-1a adrenergic receptor (by homology)	ADRA1A	P35348
RS010	Dopamine D3 receptor	DRD3	P35462
RS010	Cytochrome P450 2D6	CYP2D6	P10635
RS010	Serotonin 6 (5-HT6) receptor	HTR6	P50406
RS010	Serotonin 1b (5-HT1b) receptor (by homology)	HTR1B	P28222
RS010	Protein phosphatase 2C beta	PPM1B	O75688
RS010	Protein-tyrosine phosphatase 1B	PTPN1	P18031
RS010	Serine/threonine protein phosphatase PP1-gamma catalytic subunit	PPP1CC	P36873
RS010	Serine/threonine protein phosphatase 2A, catalytic subunit, alpha isoform	PPP2CA	P67775
RS010	Serine/threonine protein phosphatase 2A, 56 kDa regulatory subunit, alpha isoform	PPP2R5A	Q15172
RS010	Thrombin	F2	P00734
RS010	Androgen Receptor (by homology)	AR	P10275
RS010	Glucocorticoid receptor	NR3C1	P04150
RS010	Matrix metalloproteinase 9	MMP9	P14780
RS010	Galectin-3	LGALS3	P17931
RS010	Vanilloid receptor	TRPV1	Q8NER1
RS010	Methionine aminopeptidase 2	METAP2	P50579
RS010	Zinc finger protein GLI1	GLI1	P08151
RS010	Protein phosphatase 2A regulatory subunit B'	PTPA	Q15257
RS010	Protein kinase C alpha	PRKCA	P17252
RS010	Norepinephrine transporter	SLC6A2	P23975
RS010	Toll-like receptor (TLR7/TLR9)	TLR9	Q9NR96
RS010	Proto-oncogene c-JUN	JUN	P05412
RS010	P47929	LGALS7	P47929
RS010	Vitamin D receptor	VDR	P11473
RS010	Ras-related protein Rap-1A	RAP1A	P62834
RS010	Phosphodiesterase 4D	PDE4D	Q08499
RS010	Glycine receptor subunit alpha-1	GLRA1	P23415
RS010	Glycine receptor subunit alpha-2	GLRA2	P23416
RS010	Squalene synthetase (by homology)	FDFT1	P37268
RS010	Protein kinase C delta	PRKCD	Q05655
RS010	Protein kinase C beta	PRKCB	P05771
RS010	Protein kinase C epsilon	PRKCE	Q02156
RS010	Protein kinase C eta	PRKCH	P24723
RS010	Protein kinase C theta	PRKCQ	Q04759
RS010	Motilin receptor	MLNR	O43193
RS010	Carbonic anhydrase II	CA2	P00918
RS010	Carbonic anhydrase I	CA1	P00915
RS010	Carbonic anhydrase XII	CA12	O43570
RS010	Carbonic anhydrase IX	CA9	Q16790
RS010	Cyclooxygenase-2	PTGS2	P35354
RS010	Proteinase-activated receptor 2	F2RL1	P55085
RS010	Somatostatin receptor 5	SSTR5	P35346
RS010	Somatostatin receptor 2	SSTR2	P30874
RS010	Somatostatin receptor 4	SSTR4	P31391
RS010	Somatostatin receptor 1	SSTR1	P30872
RS010	Somatostatin receptor 3	SSTR3	P32745
RS010	Protein phosphatase 2C alpha	PPM1A	P35813
RS010	Cannabinoid receptor 1 (by homology)	CNR1	P21554
RS010	Carboxylesterase 2	CES2	O00748
RS010	Autotaxin	ENPP2	Q13822
RS010	Lysophosphatidic acid receptor Edg-4	LPAR2	Q9HBW0
RS010	Lysophosphatidic acid receptor Edg-7 (by homology)	LPAR3	Q9UBY5
RS010	Lysophosphatidic acid receptor Edg-2 (by homology)	LPAR1	Q92633
RS010	Tubulin--tyrosine ligase	TTL	Q8NG68
RS010	Thromboxane A2 receptor (by homology)	TBXA2R	P21731
RS010	Phospholipase A2 group 1B	PLA2G1B	P04054
RS010	Protein farnesyltransferase	FNTA	P49354
RS010	Kappa Opioid receptor	OPRK1	P41145
RS010	Squalene monooxygenase (by homology)	SQLE	Q14534
RS010	Beta-glucocerebrosidase	GBA	P04062
RS010	Pancreatic alpha-amylase	AMY2A	P04746
RS010	AMY1C	AMY1A	P04745
RS010	Lysosomal alpha-glucosidase	GAA	P10253
RS010	Tyrosinase	TYR	P14679
RS010	Interleukin-8 receptor A	CXCR1	P25024
RS010	Insulin-like growth factor II receptor	IGF2R	P11717
RS010	HMG-CoA reductase (by homology)	HMGCR	P04035
RS010	Niemann-Pick C1-like protein 1	NPC1L1	Q9UHC9
RS010	Mu opioid receptor	OPRM1	P35372
RS010	Protein kinase C gamma	PRKCG	P05129
RS010	Carbonic anhydrase VII	CA7	P43166
RS010	Carbonic anhydrase VI	CA6	P23280
RS011	Signal transducer and activator of transcription 3	STAT3	P40763
RS011	Platelet activating factor receptor	PTAFR	P25105
RS011	Interleukin-2	IL2	P60568
RS011	Vascular endothelial growth factor A	VEGFA	P15692
RS011	Acidic fibroblast growth factor	FGF1	P05230
RS011	Basic fibroblast growth factor	FGF2	P09038
RS011	Heparanase	HPSE	Q9Y251
RS011	Nuclear receptor ROR-gamma	RORC	P51449
RS011	Gamma-secretase	PSEN2	P49810
RS011	Heat shock protein HSP 90-alpha	HSP90AA1	P07900
RS011	Galectin-4	LGALS4	P56470
RS011	Galectin-3	LGALS3	P17931
RS011	Galectin-8	LGALS8	O00214
RS011	Apoptosis regulator Bcl-X	BCL2L1	Q07817
RS011	Cyclin-dependent kinase 1	CDK1	P06493
RS011	11-beta-hydroxysteroid dehydrogenase 2	HSD11B2	P80365
RS011	11-beta-hydroxysteroid dehydrogenase 1	HSD11B1	P28845
RS011	Sodium/potassium-transporting ATPase alpha-1 chain	ATP1A1	P05023
RS011	Vascular endothelial growth factor receptor 2	KDR	P35968
RS011	Serotonin 2b (5-HT2b) receptor	HTR2B	P41595
RS011	Alpha-2a adrenergic receptor	ADRA2A	P08913
RS011	Adrenergic receptor alpha-2	ADRA2C	P18825
RS011	Alpha-2b adrenergic receptor	ADRA2B	P18089
RS011	Dopamine D1 receptor	DRD1	P21728
RS011	Dopamine D2 receptor	DRD2	P14416
RS011	Alpha-1d adrenergic receptor	ADRA1D	P25100
RS011	Serotonin 2a (5-HT2a) receptor	HTR2A	P28223
RS011	Serotonin 2c (5-HT2c) receptor	HTR2C	P28335
RS011	Alpha-1a adrenergic receptor (by homology)	ADRA1A	P35348
RS011	Dopamine D3 receptor	DRD3	P35462
RS011	Cytochrome P450 2D6	CYP2D6	P10635
RS011	Serotonin 6 (5-HT6) receptor	HTR6	P50406
RS011	Serotonin 1b (5-HT1b) receptor (by homology)	HTR1B	P28222
RS011	Protein phosphatase 2C beta	PPM1B	O75688
RS011	Protein-tyrosine phosphatase 1B	PTPN1	P18031
RS011	Serine/threonine protein phosphatase PP1-gamma catalytic subunit	PPP1CC	P36873
RS011	Serine/threonine protein phosphatase 2A, catalytic subunit, alpha isoform	PPP2CA	P67775
RS011	Serine/threonine protein phosphatase 2A, 56 kDa regulatory subunit, alpha isoform	PPP2R5A	Q15172
RS011	Thrombin	F2	P00734
RS011	Androgen Receptor (by homology)	AR	P10275
RS011	Glucocorticoid receptor	NR3C1	P04150
RS011	Vanilloid receptor	TRPV1	Q8NER1
RS011	Methionine aminopeptidase 2	METAP2	P50579
RS011	HLA class I histocompatibility antigen A-3	HLA-A	P04439
RS011	Zinc finger protein GLI1	GLI1	P08151
RS011	Protein phosphatase 2A regulatory subunit B'	PTPA	Q15257
RS011	Thymidylate synthase (by homology)	TYMS	P04818
RS011	Protein kinase C alpha	PRKCA	P17252
RS011	Norepinephrine transporter	SLC6A2	P23975
RS011	Toll-like receptor (TLR7/TLR9)	TLR9	Q9NR96
RS011	Proto-oncogene c-JUN	JUN	P05412
RS011	Receptor protein-tyrosine kinase erbB-2	ERBB2	P04626
RS011	Insulin-like growth factor I receptor	IGF1R	P08069
RS011	Epidermal growth factor receptor erbB1	EGFR	P00533
RS011	Matrix metalloproteinase 13	MMP13	P45452
RS011	Matrix metalloproteinase 2	MMP2	P08253
RS011	Matrix metalloproteinase 8	MMP8	P22894
RS011	Vitamin D receptor	VDR	P11473
RS011	Serine/threonine-protein kinase Aurora-B	AURKB	Q96GD4
RS011	Serine/threonine-protein kinase Aurora-A	AURKA	O14965
RS011	Ras-related protein Rap-1A	RAP1A	P62834
RS011	Phosphodiesterase 4D	PDE4D	Q08499
RS011	Glycine receptor subunit alpha-1	GLRA1	P23415
RS011	Glycine receptor subunit alpha-2	GLRA2	P23416
RS011	Neurotensin receptor 2	NTSR2	O95665
RS011	Neurotensin receptor 3	SORT1	Q99523
RS011	Neurotensin receptor 1	NTSR1	P30989
RS011	6-phosphofructo-2-kinase/fructose-2,6-bisphosphatase 3	PFKFB3	Q16875
RS011	Hepatocyte growth factor receptor	MET	P08581
RS011	Adenosine A1 receptor (by homology)	ADORA1	P30542
RS011	Delta opioid receptor (by homology)	OPRD1	P41143
RS011	Squalene synthetase (by homology)	FDFT1	P37268
RS011	Cholecystokinin A receptor	CCKAR	P32238
RS011	Cholecystokinin B receptor	CCKBR	P32239
RS011	Protein kinase C delta	PRKCD	Q05655
RS011	Protein kinase C beta	PRKCB	P05771
RS011	Protein kinase C epsilon	PRKCE	Q02156
RS011	Protein kinase C eta	PRKCH	P24723
RS011	Protein kinase C theta	PRKCQ	Q04759
RS011	Motilin receptor	MLNR	O43193
RS011	Carbonic anhydrase II	CA2	P00918
RS011	Carbonic anhydrase I	CA1	P00915
RS011	Carbonic anhydrase XII	CA12	O43570
RS011	Carbonic anhydrase IX	CA9	Q16790
RS011	Cyclooxygenase-2	PTGS2	P35354
RS011	Proteinase-activated receptor 2	F2RL1	P55085
RS011	Somatostatin receptor 5	SSTR5	P35346
RS011	Somatostatin receptor 2	SSTR2	P30874
RS011	Somatostatin receptor 4	SSTR4	P31391
RS011	Somatostatin receptor 1	SSTR1	P30872
RS011	Somatostatin receptor 3	SSTR3	P32745
RS011	Protein phosphatase 2C alpha	PPM1A	P35813
RS011	Cannabinoid receptor 1 (by homology)	CNR1	P21554
RS011	Carboxylesterase 2	CES2	O00748
RS011	Autotaxin	ENPP2	Q13822
RS011	Lysophosphatidic acid receptor Edg-4	LPAR2	Q9HBW0
RS011	Lysophosphatidic acid receptor Edg-7 (by homology)	LPAR3	Q9UBY5
RS011	Lysophosphatidic acid receptor Edg-2 (by homology)	LPAR1	Q92633
RS011	Tubulin--tyrosine ligase	TTL	Q8NG68
RS011	Thromboxane A2 receptor (by homology)	TBXA2R	P21731
RS012	Signal transducer and activator of transcription 3	STAT3	P40763
RS012	Platelet activating factor receptor	PTAFR	P25105
RS012	Interleukin-2	IL2	P60568
RS012	Vascular endothelial growth factor A	VEGFA	P15692
RS012	Acidic fibroblast growth factor	FGF1	P05230
RS012	Basic fibroblast growth factor	FGF2	P09038
RS012	Heparanase	HPSE	Q9Y251
RS012	Nuclear receptor ROR-gamma	RORC	P51449
RS012	Gamma-secretase	PSEN2	P49810
RS012	Heat shock protein HSP 90-alpha	HSP90AA1	P07900
RS012	Galectin-4	LGALS4	P56470
RS012	Galectin-3	LGALS3	P17931
RS012	Galectin-8	LGALS8	O00214
RS012	Apoptosis regulator Bcl-X	BCL2L1	Q07817
RS012	Cyclin-dependent kinase 1	CDK1	P06493
RS012	11-beta-hydroxysteroid dehydrogenase 2	HSD11B2	P80365
RS012	11-beta-hydroxysteroid dehydrogenase 1	HSD11B1	P28845
RS012	Sodium/potassium-transporting ATPase alpha-1 chain	ATP1A1	P05023
RS012	Vascular endothelial growth factor receptor 2	KDR	P35968
RS012	Serotonin 2b (5-HT2b) receptor	HTR2B	P41595
RS012	Alpha-2a adrenergic receptor	ADRA2A	P08913
RS012	Adrenergic receptor alpha-2	ADRA2C	P18825
RS012	Alpha-2b adrenergic receptor	ADRA2B	P18089
RS012	Dopamine D1 receptor	DRD1	P21728
RS012	Dopamine D2 receptor	DRD2	P14416
RS012	Alpha-1d adrenergic receptor	ADRA1D	P25100
RS012	Serotonin 2a (5-HT2a) receptor	HTR2A	P28223
RS012	Serotonin 2c (5-HT2c) receptor	HTR2C	P28335
RS012	Alpha-1a adrenergic receptor (by homology)	ADRA1A	P35348
RS012	Dopamine D3 receptor	DRD3	P35462
RS012	Cytochrome P450 2D6	CYP2D6	P10635
RS012	Serotonin 6 (5-HT6) receptor	HTR6	P50406
RS012	Serotonin 1b (5-HT1b) receptor (by homology)	HTR1B	P28222
RS012	Protein phosphatase 2C beta	PPM1B	O75688
RS012	Serine/threonine protein phosphatase PP1-gamma catalytic subunit	PPP1CC	P36873
RS012	Serine/threonine protein phosphatase 2A, catalytic subunit, alpha isoform	PPP2CA	P67775
RS012	Serine/threonine protein phosphatase 2A, 56 kDa regulatory subunit, alpha isoform	PPP2R5A	Q15172
RS012	Thrombin	F2	P00734
RS012	Androgen Receptor (by homology)	AR	P10275
RS012	Glucocorticoid receptor	NR3C1	P04150
RS012	HLA class I histocompatibility antigen A-3	HLA-A	P04439
RS012	Adenosine A1 receptor (by homology)	ADORA1	P30542
RS012	Vanilloid receptor	TRPV1	Q8NER1
RS012	Methionine aminopeptidase 2	METAP2	P50579
RS012	Zinc finger protein GLI1	GLI1	P08151
RS012	Protein phosphatase 2A regulatory subunit B'	PTPA	Q15257
RS012	Protein kinase C alpha	PRKCA	P17252
RS012	Norepinephrine transporter	SLC6A2	P23975
RS012	Toll-like receptor (TLR7/TLR9)	TLR9	Q9NR96
RS012	Cholecystokinin A receptor	CCKAR	P32238
RS012	6-phosphofructo-2-kinase/fructose-2,6-bisphosphatase 3	PFKFB3	Q16875
RS012	Delta opioid receptor	OPRD1	P41143
RS012	Cholecystokinin B receptor	CCKBR	P32239
RS012	Proto-oncogene c-JUN	JUN	P05412
RS012	Thymidylate synthase (by homology)	TYMS	P04818
RS012	Matrix metalloproteinase 13	MMP13	P45452
RS012	Matrix metalloproteinase 2	MMP2	P08253
RS012	Matrix metalloproteinase 8	MMP8	P22894
RS012	Vitamin D receptor	VDR	P11473
RS012	c-Jun N-terminal kinase 1	MAPK8	P45983
RS012	Ras-related protein Rap-1A	RAP1A	P62834
RS012	Phosphodiesterase 4D	PDE4D	Q08499
RS012	Glycine receptor subunit alpha-1	GLRA1	P23415
RS012	Glycine receptor subunit alpha-2	GLRA2	P23416
RS012	PI3-kinase p110-gamma subunit	PIK3CG	P48736
RS012	PI3-kinase p110-alpha subunit	PIK3CA	P42336
RS012	Adenosine A2a receptor	ADORA2A	P29274
RS012	Integrin alpha-V/beta-3	ITGAV	P06756
RS012	Integrin alpha-IIb/beta-3	ITGA2B	P08514
RS012	Squalene synthetase (by homology)	FDFT1	P37268
RS012	Neurotensin receptor 2	NTSR2	O95665
RS012	Neurotensin receptor 3	SORT1	Q99523
RS012	Neurotensin receptor 1	NTSR1	P30989
RS012	Protein kinase C delta	PRKCD	Q05655
RS012	Protein kinase C beta	PRKCB	P05771
RS012	Protein kinase C epsilon	PRKCE	Q02156
RS012	Protein kinase C eta	PRKCH	P24723
RS012	Protein kinase C theta	PRKCQ	Q04759
RS012	Motilin receptor	MLNR	O43193
RS012	Carbonic anhydrase II	CA2	P00918
RS012	Carbonic anhydrase I	CA1	P00915
RS012	Carbonic anhydrase XII	CA12	O43570
RS012	Carbonic anhydrase IX	CA9	Q16790
RS012	Cyclooxygenase-2	PTGS2	P35354
RS012	Proteinase-activated receptor 2	F2RL1	P55085
RS012	Somatostatin receptor 5	SSTR5	P35346
RS012	Somatostatin receptor 2	SSTR2	P30874
RS012	Somatostatin receptor 4	SSTR4	P31391
RS012	Somatostatin receptor 1	SSTR1	P30872
RS012	Somatostatin receptor 3	SSTR3	P32745
RS012	Protein phosphatase 2C alpha	PPM1A	P35813
RS012	Cannabinoid receptor 1 (by homology)	CNR1	P21554
RS012	Carboxylesterase 2	CES2	O00748
RS012	Autotaxin	ENPP2	Q13822
RS012	Lysophosphatidic acid receptor Edg-4	LPAR2	Q9HBW0
RS012	Lysophosphatidic acid receptor Edg-7 (by homology)	LPAR3	Q9UBY5
RS012	Lysophosphatidic acid receptor Edg-2 (by homology)	LPAR1	Q92633
RS012	Tubulin--tyrosine ligase	TTL	Q8NG68
RS012	Protein-tyrosine phosphatase 1B	PTPN1	P18031
RS012	Thromboxane A2 receptor (by homology)	TBXA2R	P21731
RS013	Signal transducer and activator of transcription 3	STAT3	P40763
RS013	Platelet activating factor receptor	PTAFR	P25105
RS013	Interleukin-2	IL2	P60568
RS013	Vascular endothelial growth factor A	VEGFA	P15692
RS013	Acidic fibroblast growth factor	FGF1	P05230
RS013	Basic fibroblast growth factor	FGF2	P09038
RS013	Heparanase	HPSE	Q9Y251
RS013	Nuclear receptor ROR-gamma	RORC	P51449
RS013	Gamma-secretase	PSEN2	P49810
RS013	Heat shock protein HSP 90-alpha	HSP90AA1	P07900
RS013	Galectin-4	LGALS4	P56470
RS013	Galectin-3	LGALS3	P17931
RS013	Galectin-8	LGALS8	O00214
RS013	Apoptosis regulator Bcl-X	BCL2L1	Q07817
RS013	Cyclin-dependent kinase 1	CDK1	P06493
RS013	11-beta-hydroxysteroid dehydrogenase 2	HSD11B2	P80365
RS013	11-beta-hydroxysteroid dehydrogenase 1	HSD11B1	P28845
RS013	Sodium/potassium-transporting ATPase alpha-1 chain	ATP1A1	P05023
RS013	Vascular endothelial growth factor receptor 2	KDR	P35968
RS013	Serotonin 2b (5-HT2b) receptor	HTR2B	P41595
RS013	Alpha-2a adrenergic receptor	ADRA2A	P08913
RS013	Adrenergic receptor alpha-2	ADRA2C	P18825
RS013	Alpha-2b adrenergic receptor	ADRA2B	P18089
RS013	Dopamine D1 receptor	DRD1	P21728
RS013	Dopamine D2 receptor	DRD2	P14416
RS013	Alpha-1d adrenergic receptor	ADRA1D	P25100
RS013	Serotonin 2a (5-HT2a) receptor	HTR2A	P28223
RS013	Serotonin 2c (5-HT2c) receptor	HTR2C	P28335
RS013	Alpha-1a adrenergic receptor (by homology)	ADRA1A	P35348
RS013	Dopamine D3 receptor	DRD3	P35462
RS013	Cytochrome P450 2D6	CYP2D6	P10635
RS013	Serotonin 6 (5-HT6) receptor	HTR6	P50406
RS013	Serotonin 1b (5-HT1b) receptor (by homology)	HTR1B	P28222
RS013	Protein phosphatase 2C beta	PPM1B	O75688
RS013	Serine/threonine protein phosphatase PP1-gamma catalytic subunit	PPP1CC	P36873
RS013	Serine/threonine protein phosphatase 2A, catalytic subunit, alpha isoform	PPP2CA	P67775
RS013	Serine/threonine protein phosphatase 2A, 56 kDa regulatory subunit, alpha isoform	PPP2R5A	Q15172
RS013	Thrombin	F2	P00734
RS013	Androgen Receptor (by homology)	AR	P10275
RS013	Glucocorticoid receptor	NR3C1	P04150
RS013	HLA class I histocompatibility antigen A-3	HLA-A	P04439
RS013	Adenosine A1 receptor (by homology)	ADORA1	P30542
RS013	Vanilloid receptor	TRPV1	Q8NER1
RS013	Methionine aminopeptidase 2	METAP2	P50579
RS013	Zinc finger protein GLI1	GLI1	P08151
RS013	Protein phosphatase 2A regulatory subunit B'	PTPA	Q15257
RS013	Protein kinase C alpha	PRKCA	P17252
RS013	Norepinephrine transporter	SLC6A2	P23975
RS013	Toll-like receptor (TLR7/TLR9)	TLR9	Q9NR96
RS013	Cholecystokinin A receptor	CCKAR	P32238
RS013	6-phosphofructo-2-kinase/fructose-2,6-bisphosphatase 3	PFKFB3	Q16875
RS013	Delta opioid receptor	OPRD1	P41143
RS013	Cholecystokinin B receptor	CCKBR	P32239
RS013	Proto-oncogene c-JUN	JUN	P05412
RS013	Thymidylate synthase (by homology)	TYMS	P04818
RS013	Matrix metalloproteinase 13	MMP13	P45452
RS013	Matrix metalloproteinase 2	MMP2	P08253
RS013	Matrix metalloproteinase 8	MMP8	P22894
RS013	Vitamin D receptor	VDR	P11473
RS013	c-Jun N-terminal kinase 1	MAPK8	P45983
RS013	Ras-related protein Rap-1A	RAP1A	P62834
RS013	Phosphodiesterase 4D	PDE4D	Q08499
RS013	Glycine receptor subunit alpha-1	GLRA1	P23415
RS013	Glycine receptor subunit alpha-2	GLRA2	P23416
RS013	PI3-kinase p110-gamma subunit	PIK3CG	P48736
RS013	PI3-kinase p110-alpha subunit	PIK3CA	P42336
RS013	Adenosine A2a receptor	ADORA2A	P29274
RS013	Integrin alpha-V/beta-3	ITGAV	P06756
RS013	Integrin alpha-IIb/beta-3	ITGA2B	P08514
RS013	Squalene synthetase (by homology)	FDFT1	P37268
RS013	Neurotensin receptor 2	NTSR2	O95665
RS013	Neurotensin receptor 3	SORT1	Q99523
RS013	Neurotensin receptor 1	NTSR1	P30989
RS013	Protein kinase C delta	PRKCD	Q05655
RS013	Protein kinase C beta	PRKCB	P05771
RS013	Protein kinase C epsilon	PRKCE	Q02156
RS013	Protein kinase C eta	PRKCH	P24723
RS013	Protein kinase C theta	PRKCQ	Q04759
RS013	Motilin receptor	MLNR	O43193
RS013	Carbonic anhydrase II	CA2	P00918
RS013	Carbonic anhydrase I	CA1	P00915
RS013	Carbonic anhydrase XII	CA12	O43570
RS013	Carbonic anhydrase IX	CA9	Q16790
RS013	Cyclooxygenase-2	PTGS2	P35354
RS013	Proteinase-activated receptor 2	F2RL1	P55085
RS013	Somatostatin receptor 5	SSTR5	P35346
RS013	Somatostatin receptor 2	SSTR2	P30874
RS013	Somatostatin receptor 4	SSTR4	P31391
RS013	Somatostatin receptor 1	SSTR1	P30872
RS013	Somatostatin receptor 3	SSTR3	P32745
RS013	Protein phosphatase 2C alpha	PPM1A	P35813
RS013	Cannabinoid receptor 1 (by homology)	CNR1	P21554
RS013	Carboxylesterase 2	CES2	O00748
RS013	Autotaxin	ENPP2	Q13822
RS013	Lysophosphatidic acid receptor Edg-4	LPAR2	Q9HBW0
RS013	Lysophosphatidic acid receptor Edg-7 (by homology)	LPAR3	Q9UBY5
RS013	Lysophosphatidic acid receptor Edg-2 (by homology)	LPAR1	Q92633
RS013	Tubulin--tyrosine ligase	TTL	Q8NG68
RS013	Protein-tyrosine phosphatase 1B	PTPN1	P18031
RS013	Thromboxane A2 receptor (by homology)	TBXA2R	P21731
RS014	Signal transducer and activator of transcription 3	STAT3	P40763
RS014	Platelet activating factor receptor	PTAFR	P25105
RS014	Interleukin-2	IL2	P60568
RS014	Vascular endothelial growth factor A	VEGFA	P15692
RS014	Acidic fibroblast growth factor	FGF1	P05230
RS014	Basic fibroblast growth factor	FGF2	P09038
RS014	Heparanase	HPSE	Q9Y251
RS014	Nuclear receptor ROR-gamma	RORC	P51449
RS014	Heat shock protein HSP 90-alpha	HSP90AA1	P07900
RS014	Gamma-secretase	PSEN2	P49810
RS014	Cyclin-dependent kinase 1	CDK1	P06493
RS014	Galectin-4	LGALS4	P56470
RS014	Galectin-3	LGALS3	P17931
RS014	Galectin-8	LGALS8	O00214
RS014	Apoptosis regulator Bcl-X	BCL2L1	Q07817
RS014	11-beta-hydroxysteroid dehydrogenase 2	HSD11B2	P80365
RS014	11-beta-hydroxysteroid dehydrogenase 1	HSD11B1	P28845
RS014	Serotonin 2b (5-HT2b) receptor	HTR2B	P41595
RS014	Alpha-2a adrenergic receptor	ADRA2A	P08913
RS014	Adrenergic receptor alpha-2	ADRA2C	P18825
RS014	Alpha-2b adrenergic receptor	ADRA2B	P18089
RS014	Dopamine D1 receptor	DRD1	P21728
RS014	Dopamine D2 receptor	DRD2	P14416
RS014	Alpha-1d adrenergic receptor	ADRA1D	P25100
RS014	Serotonin 2a (5-HT2a) receptor	HTR2A	P28223
RS014	Serotonin 2c (5-HT2c) receptor	HTR2C	P28335
RS014	Alpha-1a adrenergic receptor (by homology)	ADRA1A	P35348
RS014	Dopamine D3 receptor	DRD3	P35462
RS014	Cytochrome P450 2D6	CYP2D6	P10635
RS014	Serotonin 6 (5-HT6) receptor	HTR6	P50406
RS014	Serotonin 1b (5-HT1b) receptor (by homology)	HTR1B	P28222
RS014	Vascular endothelial growth factor receptor 2	KDR	P35968
RS014	Sodium/potassium-transporting ATPase alpha-1 chain	ATP1A1	P05023
RS014	Protein phosphatase 2C beta	PPM1B	O75688
RS014	Protein-tyrosine phosphatase 1B	PTPN1	P18031
RS014	Serine/threonine protein phosphatase PP1-gamma catalytic subunit	PPP1CC	P36873
RS014	Serine/threonine protein phosphatase 2A, catalytic subunit, alpha isoform	PPP2CA	P67775
RS014	Serine/threonine protein phosphatase 2A, 56 kDa regulatory subunit, alpha isoform	PPP2R5A	Q15172
RS014	Thrombin	F2	P00734
RS014	Androgen Receptor (by homology)	AR	P10275
RS014	Glucocorticoid receptor	NR3C1	P04150
RS014	Matrix metalloproteinase 9	MMP9	P14780
RS014	Vanilloid receptor	TRPV1	Q8NER1
RS014	Zinc finger protein GLI1	GLI1	P08151
RS014	Protein kinase C alpha	PRKCA	P17252
RS014	Proto-oncogene c-JUN	JUN	P05412
RS014	Fibroblast growth factor receptor 1	FGFR1	P11362
RS014	Methionine aminopeptidase 2	METAP2	P50579
RS014	Adenosine A1 receptor (by homology)	ADORA1	P30542
RS014	Protein phosphatase 2A regulatory subunit B'	PTPA	Q15257
RS014	Norepinephrine transporter	SLC6A2	P23975
RS014	Toll-like receptor (TLR7/TLR9)	TLR9	Q9NR96
RS014	Glycine receptor subunit alpha-1	GLRA1	P23415
RS014	Glycine receptor subunit alpha-2	GLRA2	P23416
RS014	HLA class I histocompatibility antigen A-3	HLA-A	P04439
RS014	Thymidylate synthase (by homology)	TYMS	P04818
RS014	Squalene synthetase (by homology)	FDFT1	P37268
RS014	Neurotensin receptor 2	NTSR2	O95665
RS014	Neurotensin receptor 3	SORT1	Q99523
RS014	Neurotensin receptor 1	NTSR1	P30989
RS014	6-phosphofructo-2-kinase/fructose-2,6-bisphosphatase 3	PFKFB3	Q16875
RS014	Vitamin D receptor	VDR	P11473
RS014	Ras-related protein Rap-1A	RAP1A	P62834
RS014	Phosphodiesterase 4D	PDE4D	Q08499
RS014	Protein phosphatase 2C alpha	PPM1A	P35813
RS014	Protein kinase C delta	PRKCD	Q05655
RS014	Protein kinase C beta	PRKCB	P05771
RS014	Protein kinase C epsilon	PRKCE	Q02156
RS014	Protein kinase C eta	PRKCH	P24723
RS014	Protein kinase C theta	PRKCQ	Q04759
RS014	Motilin receptor	MLNR	O43193
RS014	Tubulin--tyrosine ligase	TTL	Q8NG68
RS014	Carbonic anhydrase II	CA2	P00918
RS014	Carbonic anhydrase I	CA1	P00915
RS014	Carbonic anhydrase XII	CA12	O43570
RS014	Carbonic anhydrase IX	CA9	Q16790
RS014	Cyclooxygenase-2	PTGS2	P35354
RS014	Proteinase-activated receptor 2	F2RL1	P55085
RS014	Somatostatin receptor 5	SSTR5	P35346
RS014	Somatostatin receptor 2	SSTR2	P30874
RS014	Somatostatin receptor 4	SSTR4	P31391
RS014	Somatostatin receptor 1	SSTR1	P30872
RS014	Somatostatin receptor 3	SSTR3	P32745
RS014	Cannabinoid receptor 1 (by homology)	CNR1	P21554
RS014	Carboxylesterase 2	CES2	O00748
RS014	Kappa Opioid receptor	OPRK1	P41145
RS014	Autotaxin	ENPP2	Q13822
RS014	Lysophosphatidic acid receptor Edg-4	LPAR2	Q9HBW0
RS014	Lysophosphatidic acid receptor Edg-7 (by homology)	LPAR3	Q9UBY5
RS014	Lysophosphatidic acid receptor Edg-2 (by homology)	LPAR1	Q92633
RS014	Pancreatic alpha-amylase	AMY2A	P04746
RS014	Thromboxane A2 receptor (by homology)	TBXA2R	P21731
RS014	AMY1C	AMY1A	P04745
RS014	Lysosomal alpha-glucosidase	GAA	P10253
RS014	Phospholipase A2 group 1B	PLA2G1B	P04054
RS014	Protein farnesyltransferase	FNTA	P49354
RS014	Squalene monooxygenase (by homology)	SQLE	Q14534
RS014	Beta-glucocerebrosidase	GBA	P04062
RS014	Tyrosinase	TYR	P14679
RS014	Nitric oxide synthase, inducible (by homology)	NOS2	P35228
RS015	Signal transducer and activator of transcription 3	STAT3	P40763
RS015	Platelet activating factor receptor	PTAFR	P25105
RS015	Interleukin-2	IL2	P60568
RS015	Vascular endothelial growth factor A	VEGFA	P15692
RS015	Acidic fibroblast growth factor	FGF1	P05230
RS015	Basic fibroblast growth factor	FGF2	P09038
RS015	Heparanase	HPSE	Q9Y251
RS015	Nuclear receptor ROR-gamma	RORC	P51449
RS015	Sodium/potassium-transporting ATPase alpha-1 chain	ATP1A1	P05023
RS015	Gamma-secretase	PSEN2	P49810
RS015	Heat shock protein HSP 90-alpha	HSP90AA1	P07900
RS015	Galectin-4	LGALS4	P56470
RS015	Galectin-3	LGALS3	P17931
RS015	Galectin-8	LGALS8	O00214
RS015	Apoptosis regulator Bcl-X	BCL2L1	Q07817
RS015	Cyclin-dependent kinase 1	CDK1	P06493
RS015	11-beta-hydroxysteroid dehydrogenase 2	HSD11B2	P80365
RS015	11-beta-hydroxysteroid dehydrogenase 1	HSD11B1	P28845
RS015	Vascular endothelial growth factor receptor 2	KDR	P35968
RS015	Serotonin 2b (5-HT2b) receptor	HTR2B	P41595
RS015	Alpha-2a adrenergic receptor	ADRA2A	P08913
RS015	Adrenergic receptor alpha-2	ADRA2C	P18825
RS015	Alpha-2b adrenergic receptor	ADRA2B	P18089
RS015	Dopamine D1 receptor	DRD1	P21728
RS015	Dopamine D2 receptor	DRD2	P14416
RS015	Alpha-1d adrenergic receptor	ADRA1D	P25100
RS015	Serotonin 2a (5-HT2a) receptor	HTR2A	P28223
RS015	Serotonin 2c (5-HT2c) receptor	HTR2C	P28335
RS015	Alpha-1a adrenergic receptor (by homology)	ADRA1A	P35348
RS015	Dopamine D3 receptor	DRD3	P35462
RS015	Cytochrome P450 2D6	CYP2D6	P10635
RS015	Serotonin 6 (5-HT6) receptor	HTR6	P50406
RS015	Serotonin 1b (5-HT1b) receptor (by homology)	HTR1B	P28222
RS015	Protein phosphatase 2C beta	PPM1B	O75688
RS015	Protein-tyrosine phosphatase 1B	PTPN1	P18031
RS015	Serine/threonine protein phosphatase PP1-gamma catalytic subunit	PPP1CC	P36873
RS015	Serine/threonine protein phosphatase 2A, catalytic subunit, alpha isoform	PPP2CA	P67775
RS015	Serine/threonine protein phosphatase 2A, 56 kDa regulatory subunit, alpha isoform	PPP2R5A	Q15172
RS015	Thrombin	F2	P00734
RS015	Androgen Receptor (by homology)	AR	P10275
RS015	Glucocorticoid receptor	NR3C1	P04150
RS015	Matrix metalloproteinase 9	MMP9	P14780
RS015	Vanilloid receptor	TRPV1	Q8NER1
RS015	Methionine aminopeptidase 2	METAP2	P50579
RS015	Zinc finger protein GLI1	GLI1	P08151
RS015	Protein phosphatase 2A regulatory subunit B'	PTPA	Q15257
RS015	Protein kinase C alpha	PRKCA	P17252
RS015	Norepinephrine transporter	SLC6A2	P23975
RS015	Toll-like receptor (TLR7/TLR9)	TLR9	Q9NR96
RS015	Adenosine A2a receptor	ADORA2A	P29274
RS015	Proto-oncogene c-JUN	JUN	P05412
RS015	Hepatic lipase	LIPC	P11150
RS015	Adrenergic receptor beta	ADRB2	P07550
RS015	Cyclin-dependent kinase 4/cyclin D1	CCND1	P24385
RS015	CDK2/Cyclin A	CCNA2	P20248
RS015	Sphingosine 1-phosphate receptor Edg-1	S1PR1	P21453
RS015	Matrix metalloproteinase 13	MMP13	P45452
RS015	Telomerase reverse transcriptase	TERT	O14746
RS015	Matrix metalloproteinase 2	MMP2	P08253
RS015	Thymidylate synthase (by homology)	TYMS	P04818
RS015	Vitamin D receptor	VDR	P11473
RS015	Ras-related protein Rap-1A	RAP1A	P62834
RS015	Phosphodiesterase 4D	PDE4D	Q08499
RS015	Glycine receptor subunit alpha-1	GLRA1	P23415
RS015	Glycine receptor subunit alpha-2	GLRA2	P23416
RS015	Enteropeptidase	TMPRSS15	P98073
RS015	Trypsin I	PRSS1	P07477
RS015	Matriptase	ST14	Q9Y5Y6
RS015	Delta opioid receptor (by homology)	OPRD1	P41143
RS015	Squalene synthetase (by homology)	FDFT1	P37268
RS015	Protein kinase C delta	PRKCD	Q05655
RS015	Protein kinase C beta	PRKCB	P05771
RS015	Protein kinase C epsilon	PRKCE	Q02156
RS015	Protein kinase C eta	PRKCH	P24723
RS015	Protein kinase C theta	PRKCQ	Q04759
RS015	Motilin receptor	MLNR	O43193
RS015	Carbonic anhydrase II	CA2	P00918
RS015	Carbonic anhydrase I	CA1	P00915
RS015	Carbonic anhydrase XII	CA12	O43570
RS015	Carbonic anhydrase IX	CA9	Q16790
RS015	Cyclooxygenase-2	PTGS2	P35354
RS015	Proteinase-activated receptor 2	F2RL1	P55085
RS015	Somatostatin receptor 5	SSTR5	P35346
RS015	Somatostatin receptor 2	SSTR2	P30874
RS015	Somatostatin receptor 4	SSTR4	P31391
RS015	Somatostatin receptor 1	SSTR1	P30872
RS015	Somatostatin receptor 3	SSTR3	P32745
RS015	Protein phosphatase 2C alpha	PPM1A	P35813
RS015	Carboxylesterase 2	CES2	O00748
RS015	Lysophosphatidic acid receptor Edg-4	LPAR2	Q9HBW0
RS015	Lysophosphatidic acid receptor Edg-7 (by homology)	LPAR3	Q9UBY5
RS015	Lysophosphatidic acid receptor Edg-2 (by homology)	LPAR1	Q92633
RS015	Tubulin--tyrosine ligase	TTL	Q8NG68
RS015	Thromboxane A2 receptor (by homology)	TBXA2R	P21731
RS015	Phospholipase A2 group 1B	PLA2G1B	P04054
RS015	Protein farnesyltransferase	FNTA	P49354
RS015	Kappa Opioid receptor	OPRK1	P41145
RS015	Squalene monooxygenase (by homology)	SQLE	Q14534
RS015	Pancreatic alpha-amylase	AMY2A	P04746
RS015	AMY1C	AMY1A	P04745
RS016	Signal transducer and activator of transcription 3	STAT3	P40763
RS016	Platelet activating factor receptor	PTAFR	P25105
RS016	Interleukin-2	IL2	P60568
RS016	Vascular endothelial growth factor A	VEGFA	P15692
RS016	Acidic fibroblast growth factor	FGF1	P05230
RS016	Basic fibroblast growth factor	FGF2	P09038
RS016	Heparanase	HPSE	Q9Y251
RS016	Sodium/potassium-transporting ATPase alpha-1 chain	ATP1A1	P05023
RS016	Gamma-secretase	PSEN2	P49810
RS016	Heat shock protein HSP 90-alpha	HSP90AA1	P07900
RS016	Galectin-4	LGALS4	P56470
RS016	Galectin-3	LGALS3	P17931
RS016	Galectin-8	LGALS8	O00214
RS016	Apoptosis regulator Bcl-X	BCL2L1	Q07817
RS016	Cyclin-dependent kinase 1	CDK1	P06493
RS016	11-beta-hydroxysteroid dehydrogenase 2	HSD11B2	P80365
RS016	11-beta-hydroxysteroid dehydrogenase 1	HSD11B1	P28845
RS016	Nuclear receptor ROR-gamma	RORC	P51449
RS016	Vascular endothelial growth factor receptor 2	KDR	P35968
RS016	Serotonin 2b (5-HT2b) receptor	HTR2B	P41595
RS016	Alpha-2a adrenergic receptor	ADRA2A	P08913
RS016	Adrenergic receptor alpha-2	ADRA2C	P18825
RS016	Alpha-2b adrenergic receptor	ADRA2B	P18089
RS016	Dopamine D1 receptor	DRD1	P21728
RS016	Alpha-1d adrenergic receptor	ADRA1D	P25100
RS016	Serotonin 2a (5-HT2a) receptor	HTR2A	P28223
RS016	Serotonin 2c (5-HT2c) receptor	HTR2C	P28335
RS016	Alpha-1a adrenergic receptor (by homology)	ADRA1A	P35348
RS016	Dopamine D3 receptor	DRD3	P35462
RS016	Cytochrome P450 2D6	CYP2D6	P10635
RS016	Serotonin 6 (5-HT6) receptor	HTR6	P50406
RS016	Serotonin 1b (5-HT1b) receptor (by homology)	HTR1B	P28222
RS016	Protein phosphatase 2C beta	PPM1B	O75688
RS016	Serine/threonine protein phosphatase PP1-gamma catalytic subunit	PPP1CC	P36873
RS016	Serine/threonine protein phosphatase 2A, catalytic subunit, alpha isoform	PPP2CA	P67775
RS016	Serine/threonine protein phosphatase 2A, 56 kDa regulatory subunit, alpha isoform	PPP2R5A	Q15172
RS016	Androgen Receptor (by homology)	AR	P10275
RS016	Glucocorticoid receptor	NR3C1	P04150
RS016	Thymidylate synthase (by homology)	TYMS	P04818
RS016	Receptor-type tyrosine-protein phosphatase alpha	PTPRA	P18433
RS016	Integrin alpha-V/beta-3	ITGAV	P06756
RS016	Delta opioid receptor (by homology)	OPRD1	P41143
RS016	Integrin alpha-IIb/beta-3	ITGA2B	P08514
RS016	Aldehyde dehydrogenase	ALDH2	P05091
RS016	Sodium/glucose cotransporter 2	SLC5A2	P31639
RS016	Sodium/glucose cotransporter 1	SLC5A1	P13866
RS016	Vanilloid receptor	TRPV1	Q8NER1
RS016	Methionine aminopeptidase 2	METAP2	P50579
RS016	Adrenergic receptor beta	ADRB2	P07550
RS016	Coagulation factor XI	F11	P03951
RS016	Coagulation factor VII	F7	P08709
RS016	Adenosine A1 receptor (by homology)	ADORA1	P30542
RS016	Trypsin III (by homology)	PRSS3	P35030
RS016	Trypsin I (by homology)	PRSS1	P07477
RS016	Zinc finger protein GLI1	GLI1	P08151
RS016	Protein-tyrosine phosphatase 1B	PTPN1	P18031
RS016	Thrombin and coagulation factor X	F10	P00742
RS016	Protein phosphatase 2A regulatory subunit B'	PTPA	Q15257
RS016	Norepinephrine transporter	SLC6A2	P23975
RS016	Toll-like receptor (TLR7/TLR9)	TLR9	Q9NR96
RS016	Intercellular adhesion molecule (ICAM-1), Integrin alpha-L/beta-2	ITGAL	P20701
RS016	Serine/threonine-protein kinase PIM1	PIM1	P11309
RS016	Deoxycytidine kinase	DCK	P27707
RS016	Serine/threonine-protein kinase PIM2	PIM2	Q9P1W9
RS016	Serine/threonine-protein kinase PIM3	PIM3	Q86V86
RS016	Sphingosine 1-phosphate receptor Edg-3	S1PR3	Q99500
RS016	Sphingosine 1-phosphate receptor Edg-1	S1PR1	P21453
RS016	DNA topoisomerase I	TOP1	P11387
RS016	Adenosine A2a receptor	ADORA2A	P29274
RS016	Plasminogen (by homology)	PLG	P00747
RS016	Proto-oncogene c-JUN	JUN	P05412
RS016	Matrix metalloproteinase 13	MMP13	P45452
RS016	Matrix metalloproteinase 2	MMP2	P08253
RS016	Matrix metalloproteinase 8	MMP8	P22894
RS016	Glucose-dependent insulinotropic receptor	GPR119	Q8TDV5
RS016	6-phosphofructo-2-kinase/fructose-2,6-bisphosphatase 3	PFKFB3	Q16875
RS016	Insulin-like growth factor I receptor	IGF1R	P08069
RS016	Hepatic lipase	LIPC	P11150
RS016	Calpain 1	CAPN1	P07384
RS016	Cathepsin (B and K)	CTSB	P07858
RS016	Endothelial lipase	LIPG	Q9Y5X9
RS016	ADAMTS4	ADAMTS4	O75173
RS016	Ileal bile acid transporter	SLC10A2	Q12908
RS016	Estradiol 17-beta-dehydrogenase 1	HSD17B1	P14061
RS016	Histone deacetylase 3	HDAC3	O15379
RS016	Histone deacetylase 6	HDAC6	Q9UBN7
RS016	Aminopeptidase N	ANPEP	P15144
RS016	Cystinyl aminopeptidase	LNPEP	Q9UIQ6
RS016	Histone deacetylase 1	HDAC1	Q13547
RS016	Neurotensin receptor 1 (by homology)	NTSR1	P30989
RS016	HLA class I histocompatibility antigen A-3	HLA-A	P04439
RS016	Protein-tyrosine phosphatase 1C	PTPN6	P29350
RS016	Cathepsin L	CTSL	P07711
RS016	Serotonin transporter	SLC6A4	P31645
RS016	Fibroblast growth factor receptor 1	FGFR1	P11362
RS016	Vitamin D receptor	VDR	P11473
RS016	Hepatocyte growth factor receptor	MET	P08581
RS016	cAMP-dependent protein kinase alpha-catalytic subunit	PRKACA	P17612
RS016	Ras-related protein Rap-1A	RAP1A	P62834
RS016	Phosphodiesterase 4D	PDE4D	Q08499
RS017	Signal transducer and activator of transcription 3	STAT3	P40763
RS017	Vascular endothelial growth factor A	VEGFA	P15692
RS017	Acidic fibroblast growth factor	FGF1	P05230
RS017	Basic fibroblast growth factor	FGF2	P09038
RS017	Heparanase	HPSE	Q9Y251
RS017	Sodium/potassium-transporting ATPase alpha-1 chain	ATP1A1	P05023
RS017	Sodium/glucose cotransporter 2	SLC5A2	P31639
RS017	Platelet activating factor receptor	PTAFR	P25105
RS017	Interleukin-2	IL2	P60568
RS017	Sodium/glucose cotransporter 1	SLC5A1	P13866
RS017	11-beta-hydroxysteroid dehydrogenase 2	HSD11B2	P80365
RS017	11-beta-hydroxysteroid dehydrogenase 1	HSD11B1	P28845
RS017	Cyclin-dependent kinase 1	CDK1	P06493
RS017	Coagulation factor VII	F7	P08709
RS017	Dual specificity mitogen-activated protein kinase kinase 1	MAP2K1	Q02750
RS017	Angiotensin II receptor	AGTR2	P50052
RS017	Thymidylate synthase (by homology)	TYMS	P04818
RS017	Sodium/nucleoside cotransporter 2	SLC28A2	O43868
RS017	Nuclear receptor ROR-gamma	RORC	P51449
RS017	Neurokinin 2 receptor	TACR2	P21452
RS017	PI3-kinase p110-delta subunit	PIK3CD	O00329
RS017	PI3-kinase p110-beta subunit	PIK3CB	P42338
RS017	PI3-kinase p110-gamma subunit	PIK3CG	P48736
RS017	PI3-kinase p110-alpha subunit	PIK3CA	P42336
RS017	Serotonin 2b (5-HT2b) receptor	HTR2B	P41595
RS017	Alpha-2a adrenergic receptor	ADRA2A	P08913
RS017	Adrenergic receptor alpha-2	ADRA2C	P18825
RS017	Alpha-2b adrenergic receptor	ADRA2B	P18089
RS017	Dopamine D1 receptor	DRD1	P21728
RS017	Cytochrome P450 2D6	CYP2D6	P10635
RS017	Serotonin 6 (5-HT6) receptor	HTR6	P50406
RS017	Serotonin 1b (5-HT1b) receptor (by homology)	HTR1B	P28222
RS017	Phosphatidylinositol-4-phosphate 3-kinase C2 domain-containing subunit alpha	PIK3C2A	O00443
RS017	Phosphatidylinositol 3-kinase catalytic subunit type 3	PIK3C3	Q8NEB9
RS017	Phosphodiesterase 5A	PDE5A	O76074
RS017	Serine/threonine-protein kinase Aurora-B	AURKB	Q96GD4
RS017	Tyrosine-protein kinase SYK	SYK	P43405
RS017	Serine/threonine-protein kinase mTOR	MTOR	P42345
RS017	Mitogen-activated protein kinase kinase kinase 9	MAP3K9	P80192
RS017	Tyrosine-protein kinase FGR	FGR	P09769
RS017	Ribosomal protein S6 kinase 1	RPS6KB1	P23443
RS017	Serine/threonine-protein kinase Aurora-A	AURKA	O14965
RS017	Phosphatidylinositol-4-phosphate 3-kinase C2 domain-containing beta polypeptide	PIK3C2B	O00750
RS017	Plasminogen activator inhibitor-1	SERPINE1	P05121
RS017	Growth factor receptor-bound protein 2	GRB2	P62993
RS017	Peroxisome proliferator-activated receptor gamma	PPARG	P37231
RS017	Peroxisome proliferator-activated receptor alpha	PPARA	Q07869
RS017	Adenosine A1 receptor	ADORA1	P30542
RS017	Adenosine A2a receptor	ADORA2A	P29274
RS017	Adenosine A3 receptor	ADORA3	P0DMS8
RS017	MAP kinase p38 alpha	MAPK14	Q16539
RS017	Heat shock protein HSP 90-alpha	HSP90AA1	P07900
RS017	Macrophage colony stimulating factor receptor	CSF1R	P07333
RS017	DNA topoisomerase I	TOP1	P11387
RS017	Angiotensin-converting enzyme	ACE	P12821
RS017	Neprilysin	MME	P08473
RS017	Matrix metalloproteinase 13	MMP13	P45452
RS017	Endothelin-converting enzyme 1	ECE1	P42892
RS017	Galectin-4	LGALS4	P56470
RS017	Galectin-3	LGALS3	P17931
RS017	Galectin-8	LGALS8	O00214
RS017	5-lipoxygenase activating protein	ALOX5AP	P20292
RS017	Protein-tyrosine phosphatase 1B	PTPN1	P18031
RS017	Epidermal growth factor receptor erbB1	EGFR	P00533
RS017	Complement factor D	CFD	P00746
RS017	Cyclin-dependent kinase 2	CDK2	P24941
RS017	C-C chemokine receptor type 1	CCR1	P32246
RS017	Thrombin	F2	P00734
RS017	Integrin alpha-4/beta-1	ITGB1	P05556
RS017	Caspase-1	CASP1	P29466
RS017	c-Jun N-terminal kinase 1	MAPK8	P45983
RS017	c-Jun N-terminal kinase 2	MAPK9	P45984
RS017	Bcl-2-related protein A1 (by homology)	BCL2A1	Q16548
RS017	Gamma-secretase	PSEN2	P49810
RS017	Equilibrative nucleoside transporter 1	SLC29A1	Q99808
RS017	Phosphodiesterase 2A	PDE2A	O00408
RS017	Phosphodiesterase 4B	PDE4B	Q07343
RS017	6-O-methylguanine-DNA methyltransferase	MGMT	P16455
RS017	TNF-alpha	TNF	P01375
RS017	Vascular endothelial growth factor receptor 2	KDR	P35968
RS017	Androgen Receptor (by homology)	AR	P10275
RS017	Phosphodiesterase 6A	PDE6A	P16499
RS017	Thrombin and coagulation factor X	F10	P00742
RS017	Serine/threonine-protein kinase Chk1	CHEK1	O14757
RS017	Purinergic receptor P2Y12	P2RY12	Q9H244
RS017	Serotonin 1d (5-HT1d) receptor	HTR1D	P28221
RS017	Acetyl-coenzyme A transporter 1	SLC33A1	O00400
RS017	Tyrosine-protein kinase receptor UFO	AXL	P30530
RS017	Tyrosine-protein kinase receptor TYRO3	TYRO3	Q06418
RS017	Proto-oncogene tyrosine-protein kinase MER	MERTK	Q12866
RS017	Caspase-3	CASP3	P42574
RS017	Caspase-7	CASP7	P55210
RS017	Beta-glucosidase	GBA2	Q9HCG7
RS017	Cathepsin L	CTSL	P07711
RS017	Geranylgeranyl transferase type I	PGGT1B	P53609
RS017	6-phosphofructo-2-kinase/fructose-2,6-bisphosphatase 3	PFKFB3	Q16875
RS017	Programmed cell death 1 ligand 1	CD274	Q9NZQ7
RS017	Protein phosphatase 2C beta	PPM1B	O75688
RS017	Serine/threonine protein phosphatase PP1-gamma catalytic subunit	PPP1CC	P36873
RS017	Serine/threonine protein phosphatase 2A, 56 kDa regulatory subunit, alpha isoform	PPP2R5A	Q15172
RS018	Signal transducer and activator of transcription 3	STAT3	P40763
RS018	Interleukin-2	IL2	P60568
RS018	Platelet activating factor receptor	PTAFR	P25105
RS018	Apoptosis regulator Bcl-X	BCL2L1	Q07817
RS018	Vascular endothelial growth factor A	VEGFA	P15692
RS018	Acidic fibroblast growth factor	FGF1	P05230
RS018	Basic fibroblast growth factor	FGF2	P09038
RS018	Heparanase	HPSE	Q9Y251
RS018	Sodium/potassium-transporting ATPase alpha-1 chain	ATP1A1	P05023
RS018	Heat shock protein HSP 90-alpha	HSP90AA1	P07900
RS018	Thymidylate synthase (by homology)	TYMS	P04818
RS018	Integrin alpha-V/beta-3	ITGAV	P06756
RS018	Integrin alpha-IIb/beta-3	ITGA2B	P08514
RS018	Renin	REN	P00797
RS018	Neurokinin 2 receptor	TACR2	P21452
RS018	Serine/threonine-protein kinase AKT2	AKT2	P31751
RS018	Ribosomal protein S6 kinase alpha 1	RPS6KA1	Q15418
RS018	Rho-associated protein kinase 1	ROCK1	Q13464
RS018	Serine/threonine-protein kinase AKT	AKT1	P31749
RS018	Galectin-4	LGALS4	P56470
RS018	Galectin-3	LGALS3	P17931
RS018	Galectin-8	LGALS8	O00214
RS018	Gamma-secretase	PSEN2	P49810
RS018	11-beta-hydroxysteroid dehydrogenase 2	HSD11B2	P80365
RS018	11-beta-hydroxysteroid dehydrogenase 1	HSD11B1	P28845
RS018	Delta opioid receptor (by homology)	OPRD1	P41143
RS018	Sphingosine 1-phosphate receptor Edg-1	S1PR1	P21453
RS018	Receptor-type tyrosine-protein phosphatase alpha	PTPRA	P18433
RS018	Insulin-like growth factor I receptor	IGF1R	P08069
RS018	Epidermal growth factor receptor erbB1	EGFR	P00533
RS018	Matrix metalloproteinase 1	MMP1	P03956
RS018	Matrix metalloproteinase 12	MMP12	P39900
RS018	c-Jun N-terminal kinase 1	MAPK8	P45983
RS018	c-Jun N-terminal kinase 2	MAPK9	P45984
RS018	Tyrosine-protein kinase SYK	SYK	P43405
RS018	Dual specificity mitogen-activated protein kinase kinase 1	MAP2K1	Q02750
RS018	Growth factor receptor-bound protein 2	GRB2	P62993
RS018	Protein-tyrosine phosphatase 1B	PTPN1	P18031
RS018	Calpain 1	CAPN1	P07384
RS018	Bcl-2-related protein A1 (by homology)	BCL2A1	Q16548
RS018	Serine/threonine-protein kinase mTOR	MTOR	P42345
RS018	Thrombin and coagulation factor X	F10	P00742
RS018	Cystinyl aminopeptidase	LNPEP	Q9UIQ6
RS018	Sodium/glucose cotransporter 2	SLC5A2	P31639
RS018	Sodium/glucose cotransporter 1	SLC5A1	P13866
RS018	Dipeptidyl peptidase IV	DPP4	P27487
RS018	Glucose-6-phosphate translocase	SLC37A4	O43826
RS018	Leukotriene B4 receptor 1	LTB4R	Q15722
RS018	PI3-kinase p110-alpha subunit	PIK3CA	P42336
RS018	Nuclear receptor ROR-gamma	RORC	P51449
RS018	Epoxide hydratase	EPHX2	P34913
RS018	Adenosine kinase	ADK	P55263
RS018	Inhibitor of apoptosis protein 3	XIAP	P98170
RS018	Beta-secretase 1	BACE1	P56817
RS018	Macrophage colony stimulating factor receptor	CSF1R	P07333
RS018	Adrenergic receptor beta	ADRB2	P07550
RS018	Peroxisome proliferator-activated receptor alpha	PPARA	Q07869
RS018	Nerve growth factor receptor Trk-A	NTRK1	P04629
RS018	Neurotrophic tyrosine kinase receptor type 2	NTRK2	Q16620
RS018	Plasminogen	PLG	P00747
RS018	Trypsin I	PRSS1	P07477
RS018	Rho-associated protein kinase 2	ROCK2	O75116
RS018	Histone deacetylase 3	HDAC3	O15379
RS018	Histone deacetylase 6	HDAC6	Q9UBN7
RS018	Dihydroorotate dehydrogenase	DHODH	Q02127
RS018	Histone deacetylase 8	HDAC8	Q9BY41
RS018	Histone deacetylase 1	HDAC1	Q13547
RS018	Integrin alpha-5/beta-1	ITGB1	P05556
RS018	Integrin alpha-V/beta-5	ITGB5	P18084
RS018	Integrin alpha-V/beta-6	ITGAV	P06756
RS018	Matrix metalloproteinase 9	MMP9	P14780
RS018	N-lysine methyltransferase SETD8	KMT5A	Q9NQR1
RS018	Coagulation factor VII/tissue factor	F3	P13726
RS018	Caspase-3	CASP3	P42574
RS018	Peroxisome proliferator-activated receptor gamma	PPARG	P37231
RS018	Cathepsin D	CTSD	P07339
RS018	Matrix metalloproteinase 13	MMP13	P45452
RS018	Matrix metalloproteinase 2	MMP2	P08253
RS018	Hydroxycarboxylic acid receptor 2	HCAR2	Q8TDS4
RS018	Integrin alpha-V/beta-1	ITGAV	P06756
RS018	Integrin alpha-4	ITGA4	P13612
RS018	C3a anaphylatoxin chemotactic receptor	C3AR1	Q16581
RS018	Aminopeptidase N	ANPEP	P15144
RS018	G protein-coupled receptor 44	PTGDR2	Q9Y5Y4
RS018	Cyclophilin A	PPIA	P62937
RS018	Adenosine A1 receptor (by homology)	ADORA1	P30542
RS018	Cyclin-dependent kinase 2	CDK2	P24941
RS018	Receptor-type tyrosine-protein phosphatase F (LAR)	PTPRF	P10586
RS018	Integrin alpha-4/beta-1	ITGB1	P05556
RS018	C-C chemokine receptor type 5	CCR5	P51681
RS018	Leukocyte adhesion molecule-1	SELL	P14151
RS018	P-selectin	SELP	P16109
RS018	Cyclin-dependent kinase 1	CDK1	P06493
RS018	Phosphodiesterase 2A	PDE2A	O00408
RS018	Caspase-1	CASP1	P29466
RS018	Type-1 angiotensin II receptor (by homology)	AGTR1	P30556
RS018	Tyrosine-protein kinase SRC	SRC	P12931
RS018	Coagulation factor XI	F11	P03951
RS018	Coagulation factor VII	F7	P08709
RS018	Serotonin 2b (5-HT2b) receptor	HTR2B	P41595
RS019	Signal transducer and activator of transcription 3	STAT3	P40763
RS019	Vascular endothelial growth factor A	VEGFA	P15692
RS019	Acidic fibroblast growth factor	FGF1	P05230
RS019	Sodium/potassium-transporting ATPase alpha-1 chain	ATP1A1	P05023
RS019	Protein-tyrosine phosphatase 1B	PTPN1	P18031
RS019	11-beta-hydroxysteroid dehydrogenase 2	HSD11B2	P80365
RS019	Platelet activating factor receptor	PTAFR	P25105
RS019	Neurokinin 2 receptor	TACR2	P21452
RS019	Thymidylate synthase (by homology)	TYMS	P04818
RS019	Beta-secretase 1	BACE1	P56817
RS019	Growth factor receptor-bound protein 2	GRB2	P62993
RS019	Interleukin-2	IL2	P60568
RS019	Epoxide hydratase	EPHX2	P34913
RS019	Metabotropic glutamate receptor 2 (by homology)	GRM2	Q14416
RS019	Serotonin 2b (5-HT2b) receptor	HTR2B	P41595
RS019	Alpha-2a adrenergic receptor	ADRA2A	P08913
RS019	Adrenergic receptor alpha-2	ADRA2C	P18825
RS019	Alpha-2b adrenergic receptor	ADRA2B	P18089
RS019	Dopamine D1 receptor	DRD1	P21728
RS019	Cytochrome P450 2D6	CYP2D6	P10635
RS019	Serotonin 6 (5-HT6) receptor	HTR6	P50406
RS019	Serotonin 1b (5-HT1b) receptor (by homology)	HTR1B	P28222
RS019	Leukotriene B4 receptor 1	LTB4R	Q15722
RS019	Sodium/nucleoside cotransporter 2	SLC28A2	O43868
RS019	Cyclin-dependent kinase 1	CDK1	P06493
RS019	Heparanase	HPSE	Q9Y251
RS019	Receptor-type tyrosine-protein phosphatase alpha	PTPRA	P18433
RS019	Adenosine A1 receptor (by homology)	ADORA1	P30542
RS019	Delta opioid receptor (by homology)	OPRD1	P41143
RS019	5-lipoxygenase activating protein	ALOX5AP	P20292
RS019	Cysteinyl leukotriene receptor 1	CYSLTR1	Q9Y271
RS019	Phosphodiesterase 5A	PDE5A	O76074
RS019	Insulin-like growth factor I receptor	IGF1R	P08069
RS019	Matrix metalloproteinase 13	MMP13	P45452
RS019	Matrix metalloproteinase 2	MMP2	P08253
RS019	Matrix metalloproteinase 8	MMP8	P22894
RS019	Basic fibroblast growth factor	FGF2	P09038
RS019	Serine/threonine-protein phosphatase	PPP5C	Q9BPW0
RS019	Serine/threonine protein phosphatase PP1-alpha catalytic subunit	PPP1CA	P62136
RS019	Inosine-5'-monophosphate dehydrogenase 1	IMPDH1	P20839
RS019	Inosine-5'-monophosphate dehydrogenase 2	IMPDH2	P12268
RS019	Sodium/glucose cotransporter 2	SLC5A2	P31639
RS019	Sodium/glucose cotransporter 1	SLC5A1	P13866
RS019	6-phosphofructo-2-kinase/fructose-2,6-bisphosphatase 3	PFKFB3	Q16875
RS019	Thrombin and coagulation factor X	F10	P00742
RS019	Cathepsin D	CTSD	P07339
RS019	Nuclear receptor ROR-gamma	RORC	P51449
RS019	Angiotensin II receptor	AGTR2	P50052
RS019	Protein-tyrosine phosphatase LC-PTP	PTPN7	P35236
RS019	Hematopoietic cell protein-tyrosine phosphatase 70Z-PEP	PTPN22	Q9Y2R2
RS019	Protein-tyrosine phosphatase 1C	PTPN6	P29350
RS019	Leukocyte common antigen	PTPRC	P08575
RS019	Caspase-3	CASP3	P42574
RS019	Adenosine A2a receptor	ADORA2A	P29274
RS019	Cholecystokinin B receptor	CCKBR	P32239
RS019	Protein-tyrosine phosphatase 2C	PTPN11	Q06124
RS019	Splicing factor 3B subunit 3	SF3B3	Q15393
RS019	Integrin alpha-V/beta-3	ITGAV	P06756
RS019	Aldehyde dehydrogenase	ALDH2	P05091
RS019	Heat shock protein HSP 90-alpha	HSP90AA1	P07900
RS019	TNF-alpha	TNF	P01375
RS019	Tyrosine-protein kinase SRC	SRC	P12931
RS019	Hepatocyte growth factor receptor	MET	P08581
RS019	Purinergic receptor P2Y12	P2RY12	Q9H244
RS019	Caspase-1	CASP1	P29466
RS019	Probable G-protein coupled receptor 34 (by homology)	GPR34	Q9UPC5
RS019	Galectin-4	LGALS4	P56470
RS019	Galectin-3	LGALS3	P17931
RS019	Galectin-8	LGALS8	O00214
RS019	Histone deacetylase 6	HDAC6	Q9UBN7
RS019	HLA class II histocompatibility antigen DRB1-1	HLA-DRB1	P04229
RS019	Coagulation factor VII	F7	P08709
RS019	Prostanoid EP1 receptor (by homology)	PTGER1	P34995
RS019	Prostanoid EP4 receptor (by homology)	PTGER4	P35408
RS019	Prostanoid EP2 receptor (by homology)	PTGER2	P43116
RS019	Adenosine A3 receptor	ADORA3	P0DMS8
RS019	Cystinyl aminopeptidase	LNPEP	Q9UIQ6
RS019	Serine/threonine-protein kinase PIM1	PIM1	P11309
RS019	Renin	REN	P00797
RS019	Sphingosine 1-phosphate receptor Edg-3	S1PR3	Q99500
RS019	Sphingosine 1-phosphate receptor Edg-1	S1PR1	P21453
RS019	Serine/threonine-protein kinase PIM2	PIM2	Q9P1W9
RS019	Serine/threonine-protein kinase PIM3	PIM3	Q86V86
RS019	Matrix metalloproteinase 9	MMP9	P14780
RS019	Caspase-9	CASP9	P55211
RS019	Caspase-7	CASP7	P55210
RS019	Ribonucleoside-diphosphate reductase M1 chain (by homology)	RRM1	P23921
RS019	Coagulation factor VII/tissue factor	F3	P13726
RS019	Cyclin-dependent kinase 2	CDK2	P24941
RS019	Thromboxane-A synthase	TBXAS1	P24557
RS019	FK506-binding protein 1A	FKBP1A	P62942
RS019	Integrin alpha-IIb/beta-3	ITGA2B	P08514
RS019	Integrin alpha-V/beta-6	ITGAV	P06756
RS019	Serine/threonine-protein kinase mTOR	MTOR	P42345
RS019	PI3-kinase p110-alpha subunit	PIK3CA	P42336
RS019	C3a anaphylatoxin chemotactic receptor	C3AR1	Q16581
RS019	Sphingosine 1-phosphate receptor Edg-5	S1PR2	O95136
RS019	Prostanoid EP3 receptor	PTGER3	P43115
RS019	Neurokinin 3 receptor	TACR3	P29371
RS019	Hepatic lipase	LIPC	P11150
RS020	Signal transducer and activator of transcription 3	STAT3	P40763
RS020	Platelet activating factor receptor	PTAFR	P25105
RS020	Interleukin-2	IL2	P60568
RS020	Vascular endothelial growth factor A	VEGFA	P15692
RS020	Acidic fibroblast growth factor	FGF1	P05230
RS020	Basic fibroblast growth factor	FGF2	P09038
RS020	Heparanase	HPSE	Q9Y251
RS020	Nuclear receptor ROR-gamma	RORC	P51449
RS020	Sodium/potassium-transporting ATPase alpha-1 chain	ATP1A1	P05023
RS020	Gamma-secretase	PSEN2	P49810
RS020	Galectin-4	LGALS4	P56470
RS020	Galectin-3	LGALS3	P17931
RS020	Galectin-8	LGALS8	O00214
RS020	11-beta-hydroxysteroid dehydrogenase 2	HSD11B2	P80365
RS020	Thymidylate synthase (by homology)	TYMS	P04818
RS020	Heat shock protein HSP 90-alpha	HSP90AA1	P07900
RS020	Sodium/glucose cotransporter 2	SLC5A2	P31639
RS020	Serotonin 2b (5-HT2b) receptor	HTR2B	P41595
RS020	Alpha-2b adrenergic receptor	ADRA2B	P18089
RS020	Dopamine D1 receptor	DRD1	P21728
RS020	Serotonin 2c (5-HT2c) receptor	HTR2C	P28335
RS020	Alpha-1a adrenergic receptor (by homology)	ADRA1A	P35348
RS020	Cytochrome P450 2D6	CYP2D6	P10635
RS020	Serotonin 1b (5-HT1b) receptor (by homology)	HTR1B	P28222
RS020	Protein-tyrosine phosphatase 1B	PTPN1	P18031
RS020	Androgen Receptor (by homology)	AR	P10275
RS020	Protein phosphatase 2C beta	PPM1B	O75688
RS020	Serine/threonine protein phosphatase PP1-gamma catalytic subunit	PPP1CC	P36873
RS020	Serine/threonine protein phosphatase 2A, catalytic subunit, alpha isoform	PPP2CA	P67775
RS020	Serine/threonine protein phosphatase 2A, 56 kDa regulatory subunit, alpha isoform	PPP2R5A	Q15172
RS020	Adenosine A1 receptor (by homology)	ADORA1	P30542
RS020	Sodium/glucose cotransporter 1	SLC5A1	P13866
RS020	Ceramide glucosyltransferase	UGCG	Q16739
RS020	Beta-glucosidase	GBA2	Q9HCG7
RS020	Peroxisome proliferator-activated receptor gamma	PPARG	P37231
RS020	Sphingosine 1-phosphate receptor Edg-3	S1PR3	Q99500
RS020	Sphingosine 1-phosphate receptor Edg-1	S1PR1	P21453
RS020	Splicing factor 3B subunit 3	SF3B3	Q15393
RS020	Dihydrofolate reductase	DHFR	P00374
RS020	Adrenergic receptor beta	ADRB2	P07550
RS020	Beta-1 adrenergic receptor	ADRB1	P08588
RS020	Beta-3 adrenergic receptor	ADRB3	P13945
RS020	Phosphodiesterase 4B	PDE4B	Q07343
RS020	Aldehyde dehydrogenase	ALDH2	P05091
RS020	Matrix metalloproteinase 13	MMP13	P45452
RS020	Matrix metalloproteinase 2	MMP2	P08253
RS020	Matrix metalloproteinase 8	MMP8	P22894
RS020	Vascular endothelial growth factor receptor 2	KDR	P35968
RS020	Apoptosis regulator Bcl-X	BCL2L1	Q07817
RS020	Insulin-like growth factor I receptor	IGF1R	P08069
RS020	Adenosine A2a receptor	ADORA2A	P29274
RS020	Adenosine A3 receptor	ADORA3	P0DMS8
RS020	Norepinephrine transporter	SLC6A2	P23975
RS020	Histone deacetylase 6	HDAC6	Q9UBN7
RS020	Calpain 1	CAPN1	P07384
RS020	Integrin alpha-V/beta-3	ITGAV	P06756
RS020	Cyclin-dependent kinase 1	CDK1	P06493
RS020	6-phosphofructo-2-kinase/fructose-2,6-bisphosphatase 3	PFKFB3	Q16875
RS020	Delta opioid receptor (by homology)	OPRD1	P41143
RS020	Acetyl-coenzyme A transporter 1	SLC33A1	O00400
RS020	Growth factor receptor-bound protein 2	GRB2	P62993
RS020	Zinc finger protein GLI1	GLI1	P08151
RS020	Macrophage colony stimulating factor receptor	CSF1R	P07333
RS020	Peroxisome proliferator-activated receptor alpha	PPARA	Q07869
RS020	ADAMTS4	ADAMTS4	O75173
RS020	Protein phosphatase 2A regulatory subunit B'	PTPA	Q15257
RS020	6-O-methylguanine-DNA methyltransferase	MGMT	P16455
RS020	Toll-like receptor (TLR7/TLR9)	TLR9	Q9NR96
RS020	Neurokinin 2 receptor	TACR2	P21452
RS020	Ileal bile acid transporter	SLC10A2	Q12908
RS020	Vitamin D receptor	VDR	P11473
RS020	Serine/threonine-protein kinase Chk1	CHEK1	O14757
RS020	Vesicular acetylcholine transporter	SLC18A3	Q16572
RS020	Proto-oncogene c-JUN	JUN	P05412
RS020	Glycine receptor subunit alpha-1	GLRA1	P23415
RS020	Glycine receptor subunit alpha-2	GLRA2	P23416
RS020	Endothelin receptor ET-B (by homology)	EDNRB	P24530
RS020	Epidermal growth factor receptor erbB1	EGFR	P00533
RS020	Integrin alpha-IIb/beta-3	ITGA2B	P08514
RS020	Beta-galactosidase	GLB1	P16278
RS020	G-protein coupled bile acid receptor 1	GPBAR1	Q8TDU6
RS020	Matrix metalloproteinase 9	MMP9	P14780
RS020	Sigma opioid receptor (by homology)	SIGMAR1	Q99720
RS020	Histone deacetylase 3	HDAC3	O15379
RS020	Histone deacetylase 1	HDAC1	Q13547
RS020	Inhibitor of nuclear factor kappa B kinase beta subunit	IKBKB	O14920
RS020	Integrin alpha-V/beta-5	ITGB5	P18084
RS020	Integrin alpha-V/beta-1	ITGAV	P06756
RS020	Hydroxycarboxylic acid receptor 2	HCAR2	Q8TDS4
RS020	11-beta-hydroxysteroid dehydrogenase 1	HSD11B1	P28845
RS020	DNA topoisomerase I	TOP1	P11387
RS020	Integrin alpha-5/beta-1	ITGB1	P05556
RS020	Perforin-1	PRF1	P14222
RS020	Histone deacetylase 2	HDAC2	Q92769
RS020	Hepatic lipase	LIPC	P11150
RS020	Serine/threonine-protein kinase AKT2	AKT2	P31751
RS020	Histamine H3 receptor	HRH3	Q9Y5N1
RS020	Histone deacetylase 8	HDAC8	Q9BY41
RS020	Serine/threonine-protein kinase AKT	AKT1	P31749
RS020	Beta-secretase 1	BACE1	P56817
RS021	Signal transducer and activator of transcription 3	STAT3	P40763
RS021	Interleukin-2	IL2	P60568
RS021	Heat shock protein HSP 90-alpha	HSP90AA1	P07900
RS021	Gamma-secretase	PSEN2	P49810
RS021	Vascular endothelial growth factor A	VEGFA	P15692
RS021	Acidic fibroblast growth factor	FGF1	P05230
RS021	Basic fibroblast growth factor	FGF2	P09038
RS021	Heparanase	HPSE	Q9Y251
RS021	Sodium/potassium-transporting ATPase alpha-1 chain	ATP1A1	P05023
RS021	Perforin-1	PRF1	P14222
RS021	Platelet activating factor receptor	PTAFR	P25105
RS021	Histone deacetylase 6 (by homology)	HDAC6	Q9UBN7
RS021	Histone deacetylase 1	HDAC1	Q13547
RS021	Histone deacetylase 4	HDAC4	P56524
RS021	Adenosine kinase	ADK	P55263
RS021	Serine/threonine-protein kinase mTOR	MTOR	P42345
RS021	Apoptosis regulator Bcl-X	BCL2L1	Q07817
RS021	Serine/threonine-protein kinase Aurora-B	AURKB	Q96GD4
RS021	Serine/threonine-protein kinase Aurora-A	AURKA	O14965
RS021	Macrophage colony stimulating factor receptor	CSF1R	P07333
RS021	Galectin-4	LGALS4	P56470
RS021	Galectin-8	LGALS8	O00214
RS021	Serine/threonine-protein kinase PIM1	PIM1	P11309
RS021	MAP kinase p38 alpha	MAPK14	Q16539
RS021	LIM domain kinase 1	LIMK1	P53667
RS021	Serine/threonine-protein kinase Chk1	CHEK1	O14757
RS021	Nuclear receptor ROR-gamma	RORC	P51449
RS021	11-beta-hydroxysteroid dehydrogenase 2	HSD11B2	P80365
RS021	Pyruvate dehydrogenase kinase isoform 1	PDK1	Q15118
RS021	Peroxisome proliferator-activated receptor gamma	PPARG	P37231
RS021	Sodium/glucose cotransporter 2	SLC5A2	P31639
RS021	Smoothened homolog	SMO	Q99835
RS021	Cathepsin L	CTSL	P07711
RS021	Cathepsin (B and K)	CTSB	P07858
RS021	Phosphodiesterase 5A	PDE5A	O76074
RS021	Phosphodiesterase 6A	PDE6A	P16499
RS021	Sphingosine 1-phosphate receptor Edg-5	S1PR2	O95136
RS021	Dual specificity mitogen-activated protein kinase kinase 1	MAP2K1	Q02750
RS021	Transient receptor potential cation channel subfamily V member 4 (by homology)	TRPV4	Q9HBA0
RS021	Complement factor D	CFD	P00746
RS021	Sodium/glucose cotransporter 1	SLC5A1	P13866
RS021	Tyrosine-protein kinase SYK	SYK	P43405
RS021	Bcl-2-related protein A1 (by homology)	BCL2A1	Q16548
RS021	Nerve growth factor receptor Trk-A	NTRK1	P04629
RS021	Sodium channel protein type IX alpha subunit	SCN9A	Q15858
RS021	Serine/threonine-protein kinase Chk2	CHEK2	O96017
RS021	11-beta-hydroxysteroid dehydrogenase 1	HSD11B1	P28845
RS021	Low affinity sodium-glucose cotransporter	SLC5A4	Q9NY91
RS021	Histone deacetylase 3	HDAC3	O15379
RS021	6-phosphofructo-2-kinase/fructose-2,6-bisphosphatase 3	PFKFB3	Q16875
RS021	Muscle glycogen synthase	GYS1	P13807
RS021	Glucocorticoid receptor	NR3C1	P04150
RS021	TAK1/TAB1	TAB1	Q15750
RS021	5-lipoxygenase activating protein	ALOX5AP	P20292
RS021	Mitogen-activated protein kinase kinase kinase 7	MAP3K7	O43318
RS021	Calpain 2	CAPN2	P17655
RS021	Vascular endothelial growth factor receptor 2	KDR	P35968
RS021	PI3-kinase p110-alpha subunit	PIK3CA	P42336
[truncated: 9,361 more rows]
